# Supplementary material
Source: PubMed Central journal article supplement (PMC3855444)

## Supplementary Data

### Semisynthesis, cytotoxicity, antiviral activity, and drug interaction liability of 7-*O*-methylated analogues of flavonolignans from milk thistle

Hanan S. Althagafy<sup>a</sup>, Tyler N. Graf<sup>a</sup>, Arlene A. Sy-Cordero<sup>a</sup>, Brandon T. Gufford<sup>b</sup>, Mary F. Paine<sup>b</sup>, Jessica Wagoner<sup>c</sup>, Stephen J. Polyak<sup>c,d</sup>, Mitchell P. Croatt<sup>a,\*</sup>, and Nicholas H. Oberlies<sup>a,\*</sup>

<sup>a</sup> *Department of Chemistry and Biochemistry, University of North Carolina at Greensboro, Greensboro, NC 27402, USA*

<sup>b</sup> *Division of Pharmacotherapy and Experimental Therapeutics, UNC Eshelman School of Pharmacy, University of North Carolina at Chapel Hill, Chapel Hill, NC 27599, USA*

<sup>c</sup> *Department of Laboratory Medicine, University of Washington, Seattle, WA, 98104, USA*

<sup>d</sup> *Department of Global Health, University of Washington, Seattle, WA, 98104, USA*

\* Corresponding authors. Tel.: +1 336 334 5474 (N.H.O.) and +1 336 334 3785 (M.P.C.).

*E-mail addresses:* nicholas\_oberlies@uncg.edu (N.H.O.) and mpcroatt@uncg.edu (M.P.C.).

| <b>Table of Content</b>                                                                                                                                                                        | <b>Page</b> |
|------------------------------------------------------------------------------------------------------------------------------------------------------------------------------------------------|-------------|
| <b>Figure S1.</b> HPLC chromatograms of crude reaction mixtures (left column) and purified 7- <i>O</i> -methylflavonolignans (right column) at 288 nm                                          | S3          |
| <b>Figure S2.</b> <sup>1</sup> H NMR spectra (500 MHz, 30 °C) of silybin A ( <b>1</b> ) and 7- <i>O</i> -methylysilybin A ( <b>2</b> ) in DMSO- <i>d</i> <sub>6</sub>                          | S4          |
| <b>Figure S3.</b> <sup>13</sup> C NMR spectra (125 MHz, 30 °C) of silybin A ( <b>1</b> ) and 7- <i>O</i> -methylysilybin A ( <b>2</b> ) in DMSO- <i>d</i> <sub>6</sub>                         | S5          |
| <b>Figure S4.</b> HMBC NMR spectrum (DMSO- <i>d</i> <sub>6</sub> , 30 °C) of 7- <i>O</i> -methylysilybin A ( <b>2</b> ) showing the key correlation between the methoxy protons and C-7        | S6          |
| <b>Figure S5.</b> <sup>1</sup> H NMR spectra (500 MHz, 30 °C) of silybin B ( <b>3</b> ) and 7- <i>O</i> -methylysilybin B ( <b>4</b> ) in DMSO- <i>d</i> <sub>6</sub>                          | S7          |
| <b>Figure S6.</b> <sup>13</sup> C NMR spectra (125 MHz, 30 °C) of silybin B ( <b>3</b> ) and 7- <i>O</i> -methylysilybin B ( <b>4</b> ) in DMSO- <i>d</i> <sub>6</sub>                         | S8          |
| <b>Figure S7.</b> HMBC NMR spectrum (DMSO- <i>d</i> <sub>6</sub> , 30 °C) of 7- <i>O</i> -methylysilybin B ( <b>4</b> ) showing the key correlation between the methoxy protons and C-7        | S9          |
| <b>Figure S8.</b> <sup>1</sup> H NMR spectra (500 MHz, 30 °C) of isosilybin A ( <b>5</b> ) and 7- <i>O</i> -methyლისosilybin A ( <b>6</b> ) in DMSO- <i>d</i> <sub>6</sub>                     | S10         |
| <b>Figure S9.</b> <sup>13</sup> C NMR spectra (125 MHz, 30 °C) of isosilybin A ( <b>5</b> ) and 7- <i>O</i> -methyლისosilybin A ( <b>6</b> ) in DMSO- <i>d</i> <sub>6</sub>                    | S11         |
| <b>Figure S10.</b> HMBC NMR spectrum (DMSO- <i>d</i> <sub>6</sub> , 30 °C) of 7- <i>O</i> -methyლისosilybin A ( <b>6</b> ) showing the key correlation between the methoxy protons and C-7     | S12         |
| <b>Figure S11.</b> <sup>1</sup> H NMR spectra (500 MHz, 30 °C) of isosilybin B ( <b>7</b> ) and 7- <i>O</i> -methyლისosilybin B ( <b>8</b> ) in DMSO- <i>d</i> <sub>6</sub>                    | S13         |
| <b>Figure S12.</b> <sup>13</sup> C NMR spectra (125 MHz, 30 °C) of isosilybin B ( <b>7</b> ) and 7- <i>O</i> -methyლისosilybin B ( <b>8</b> ) in DMSO- <i>d</i> <sub>6</sub>                   | S14         |
| <b>Figure S13.</b> HMBC NMR spectrum (DMSO- <i>d</i> <sub>6</sub> , 30 °C) of 7- <i>O</i> -methyლისosilybin B ( <b>8</b> ) showing the key correlation between the methoxy protons and C-7     | S15         |
| <b>Figure S14.</b> <sup>1</sup> H NMR spectra (500 MHz, 30 °C) of silychristin ( <b>9</b> ) and 7- <i>O</i> -methylysilychristin ( <b>10</b> ) in DMSO- <i>d</i> <sub>6</sub>                  | S16         |
| <b>Figure S15.</b> <sup>13</sup> C NMR spectra (125 MHz, 30 °C) of silychristin ( <b>9</b> ) and 7- <i>O</i> -methylysilychristin ( <b>10</b> ) in DMSO- <i>d</i> <sub>6</sub>                 | S17         |
| <b>Figure S16.</b> HMBC NMR spectrum (DMSO- <i>d</i> <sub>6</sub> , 30 °C) of 7- <i>O</i> -methylysilychristin ( <b>10</b> ) showing the key correlation between the methoxy protons and C-7   | S18         |
| <b>Figure S17.</b> <sup>1</sup> H NMR spectra (500 MHz, 30 °C) of isosilychristin ( <b>11</b> ) and 7- <i>O</i> -methyლისosilychristin ( <b>12</b> ) in DMSO- <i>d</i> <sub>6</sub>            | S19         |
| <b>Figure S18.</b> <sup>13</sup> C NMR spectra (125 MHz, 30 °C) of isosilychristin ( <b>11</b> ) and 7- <i>O</i> -methyლისosilychristin ( <b>12</b> ) in DMSO- <i>d</i> <sub>6</sub>           | S20         |
| <b>Figure S19.</b> HMBC NMR spectrum (DMSO- <i>d</i> <sub>6</sub> , 30 °C) of 7- <i>O</i> -methyლისosilychristin ( <b>12</b> ) showing the key correlation between the methoxy protons and C-7 | S21         |
| <b>Figure S20.</b> <sup>1</sup> H NMR spectra (500 MHz, 30 °C) of silydianin ( <b>13</b> ) and 7- <i>O</i> -methylysilydianin ( <b>14</b> ) in DMSO- <i>d</i> <sub>6</sub>                     | S22         |
| <b>Figure S21.</b> <sup>13</sup> C NMR spectra (125 MHz, 30 °C) of silydianin ( <b>13</b> ) and 7- <i>O</i> -methylysilydianin ( <b>14</b> ) in DMSO- <i>d</i> <sub>6</sub>                    | S23         |
| <b>Figure S22.</b> HMBC NMR spectrum (DMSO- <i>d</i> <sub>6</sub> , 30 °C) of 7- <i>O</i> -methylysilydianin ( <b>14</b> ) showing the key correlation between the methoxy protons and C-7     | S24         |
| <b>Figure S23.</b> Key HMBC correlations of 7- <i>O</i> -methylflavonolignans                                                                                                                  | S25         |

**Figure S1.** HPLC chromatograms of crude reaction mixtures (left column) and purified 7-*O*-methylflavonolignans (right column) at 288 nm

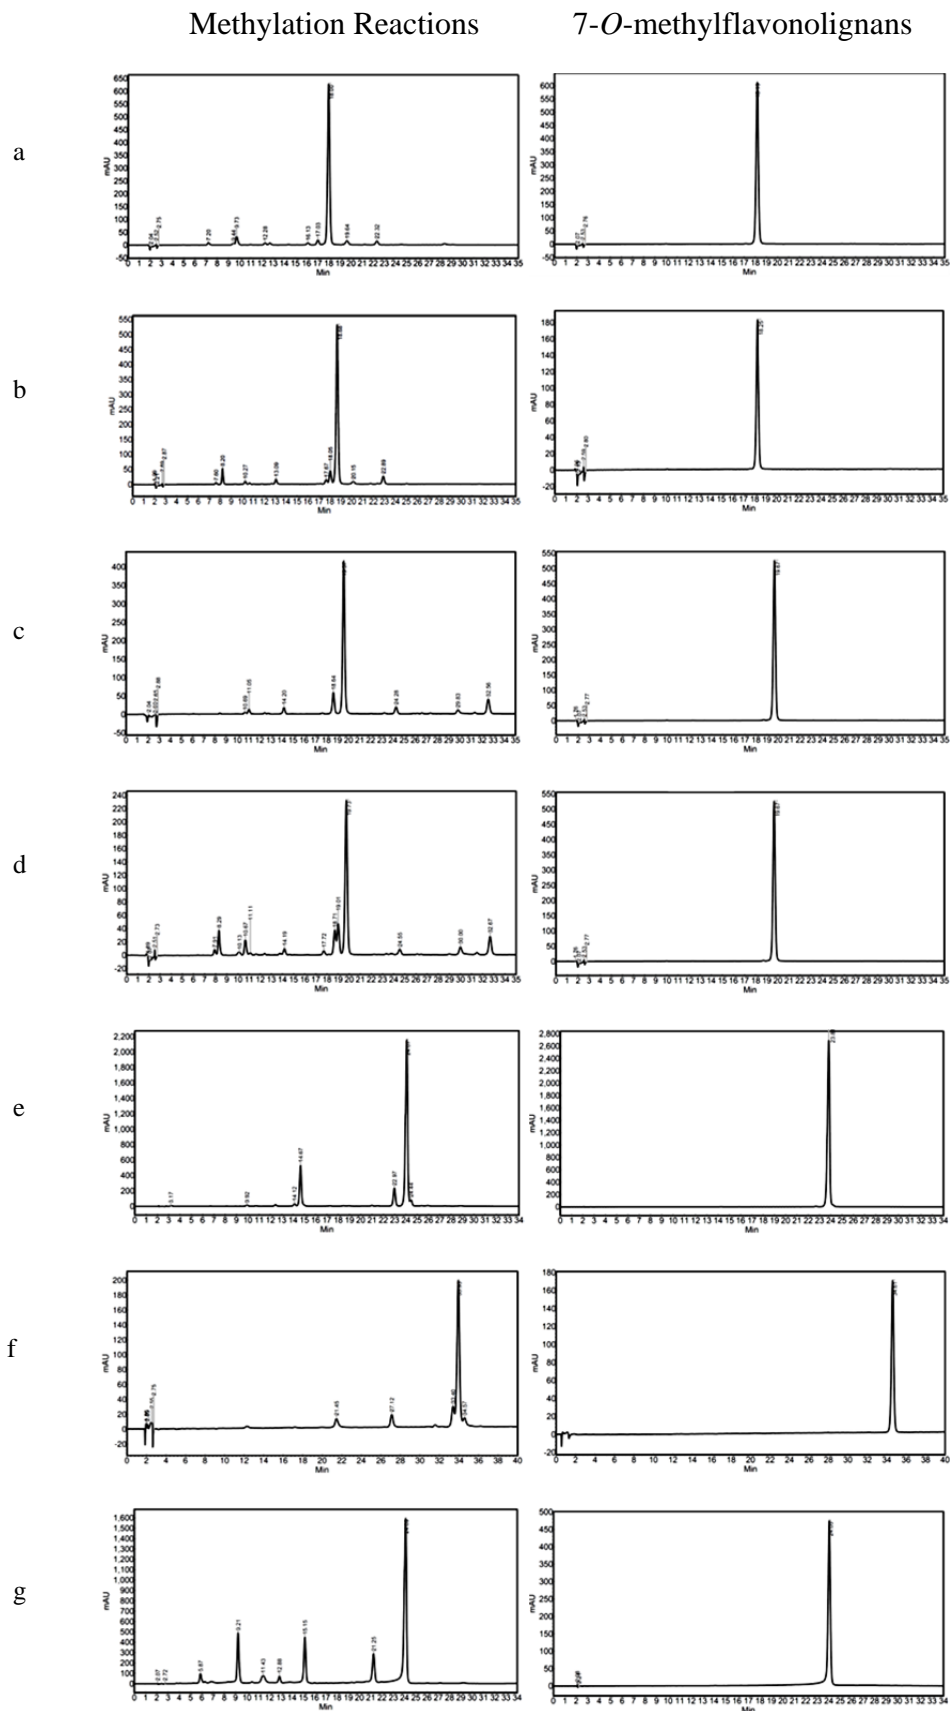

Starting materials were (a) silybin A; (b) silybin B; (c) isosilybin A; (d) isosilybin B; (e) silychristin; (f) isosilychristin; (g) silydianin

**Figure S2.**  $^1\text{H}$  NMR spectra (500 MHz, 30 °C) of silybin A (**1**) and 7-*O*-methylsilybin A (**2**) in  $\text{DMSO-}d_6$

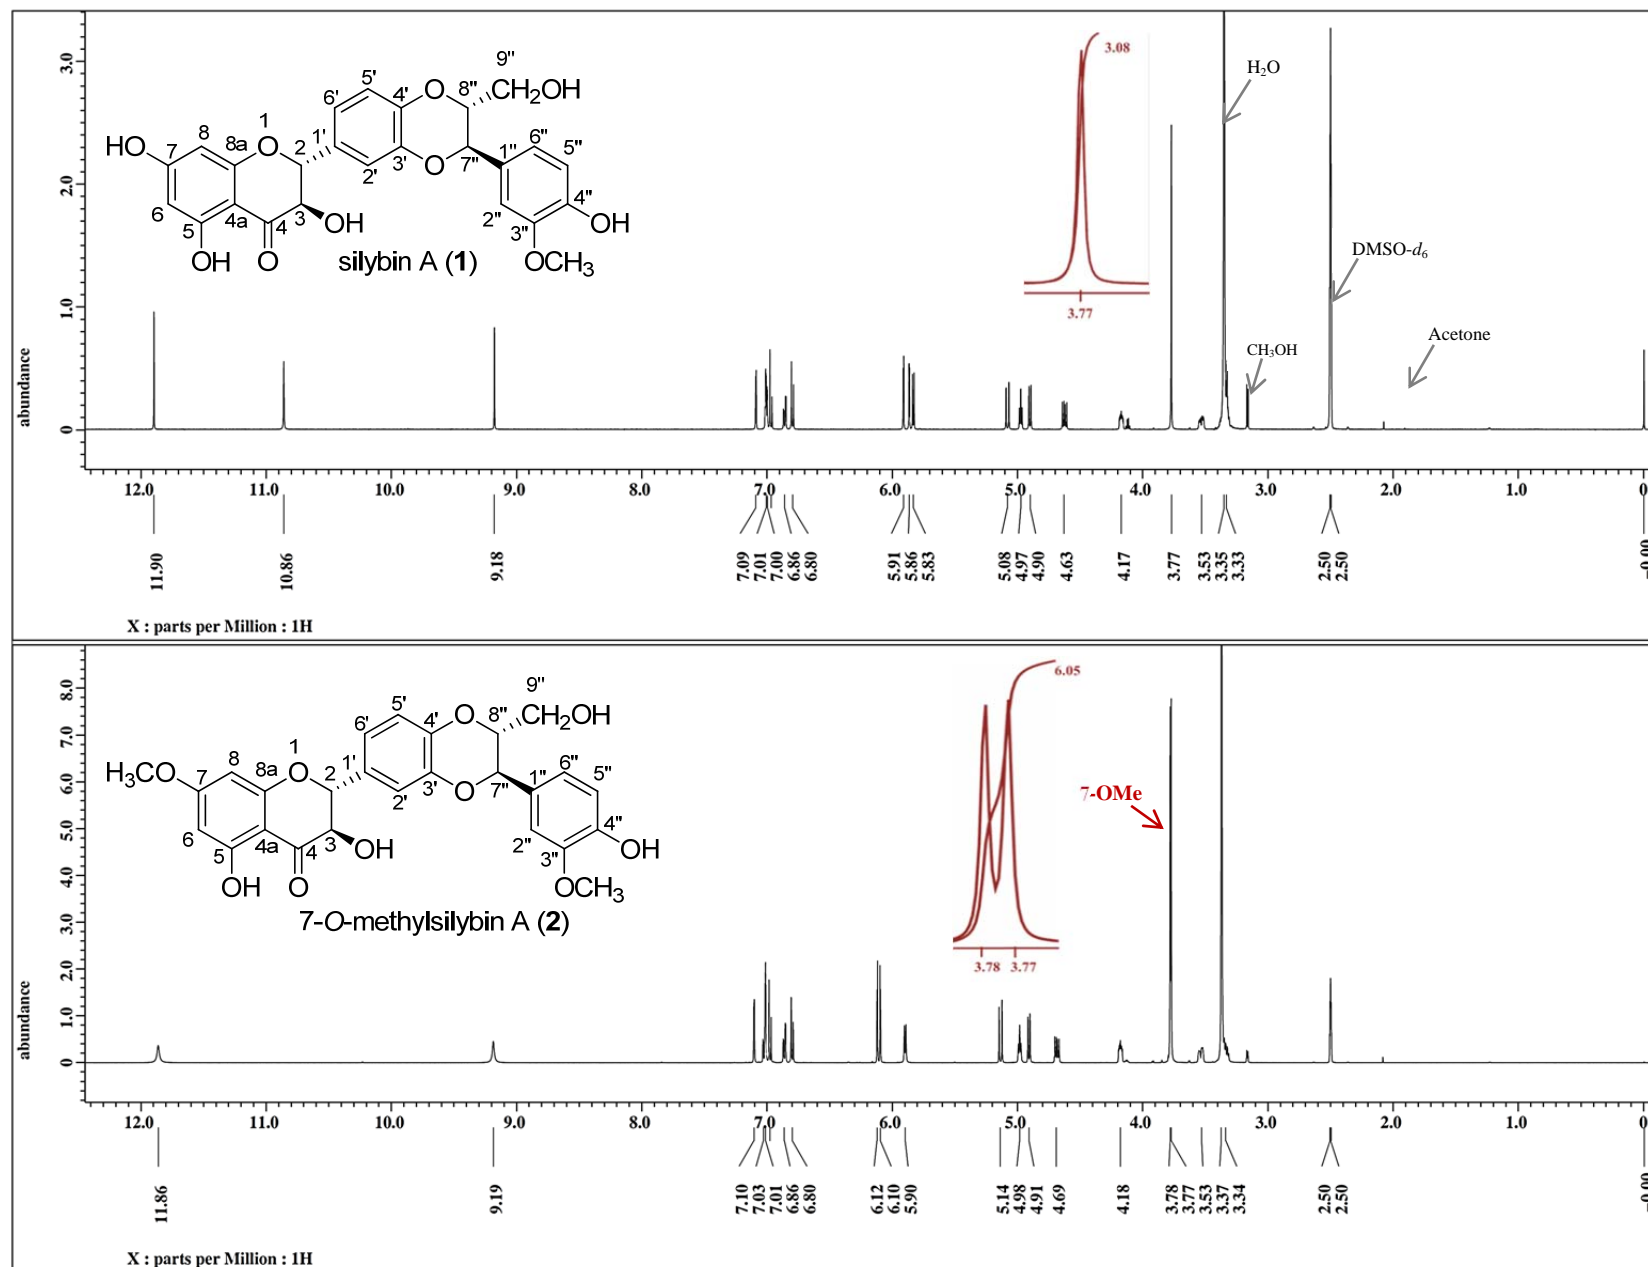

**Figure S3.**  $^{13}\text{C}$  NMR spectra (125 MHz, 30 °C) of silybin A (**1**) and 7-*O*-methylsilybin A (**2**) in  $\text{DMSO-}d_6$

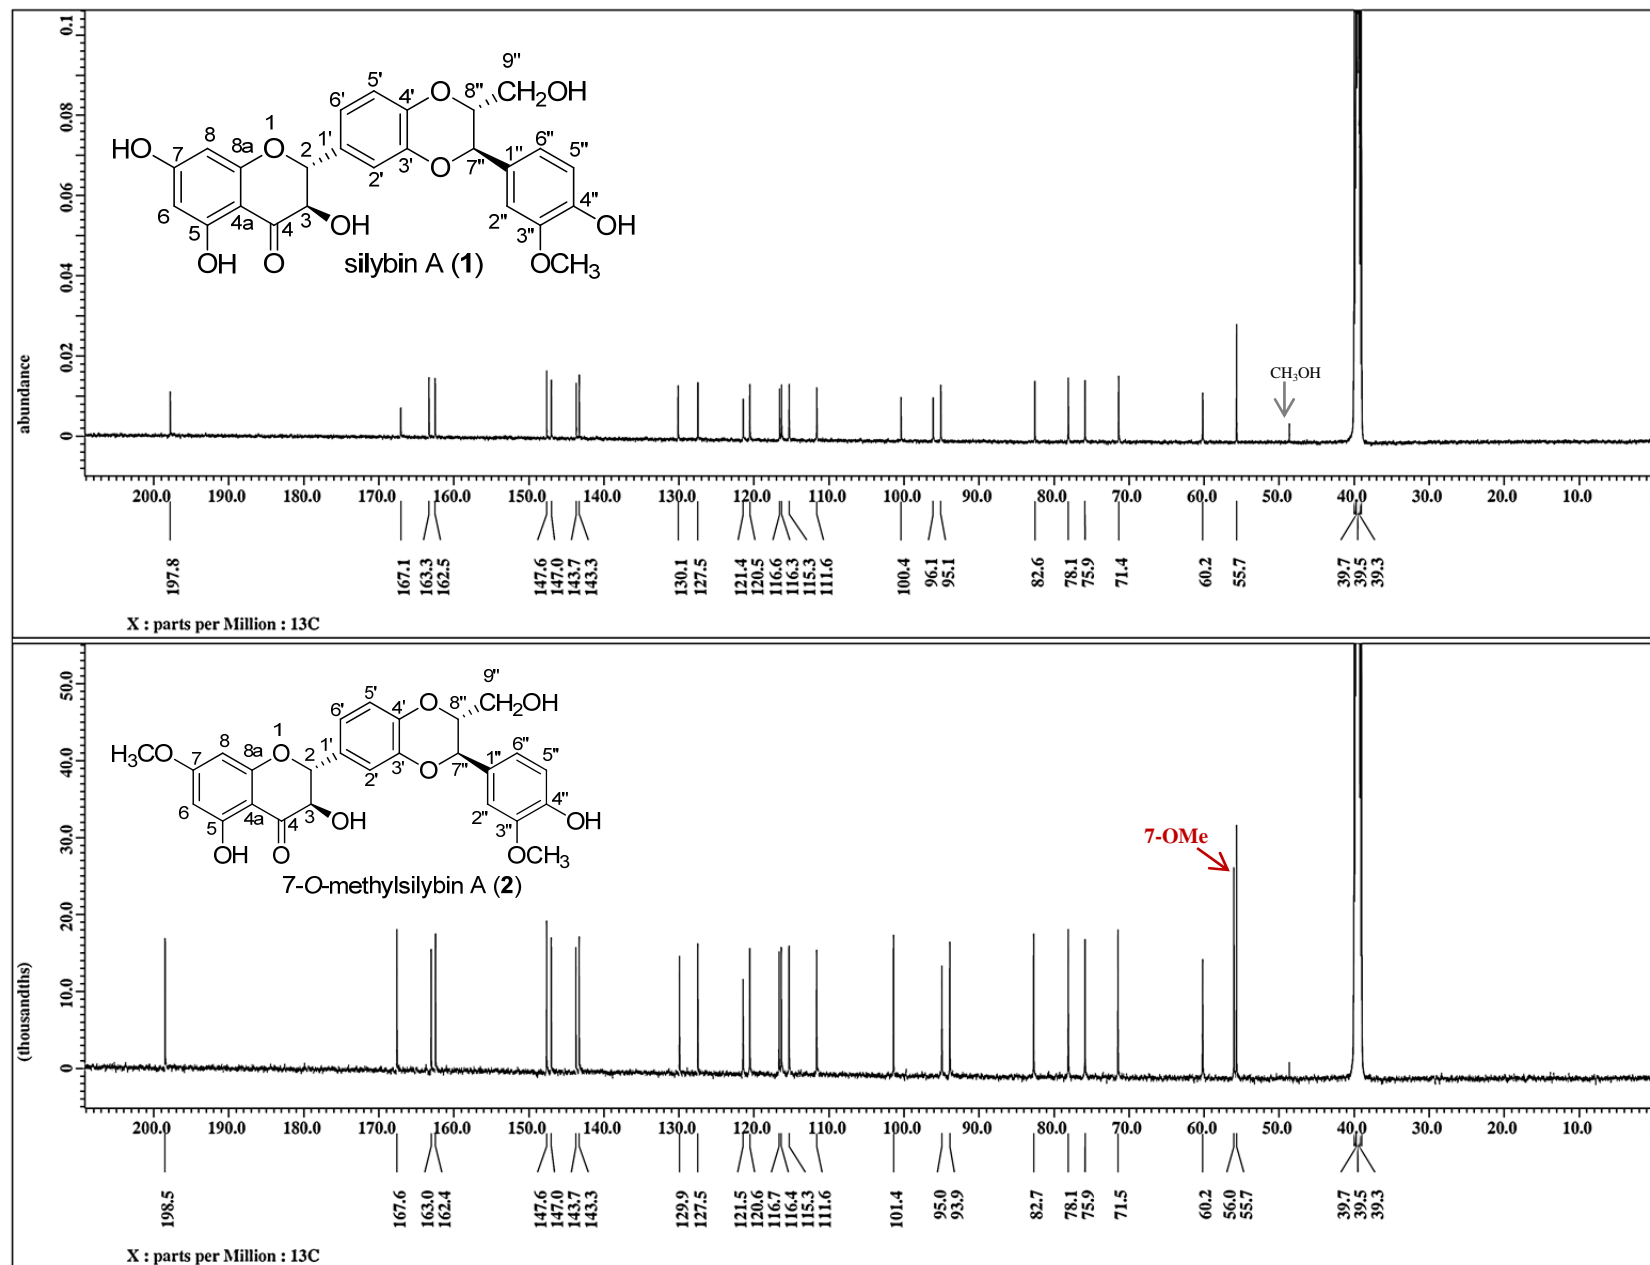

**Figure S4.** HMBC NMR spectrum (DMSO-*d*<sub>6</sub>, 30°C) of 7-*O*-methylsilybin A (**2**) showing the key correlation between the methoxy protons and C-7

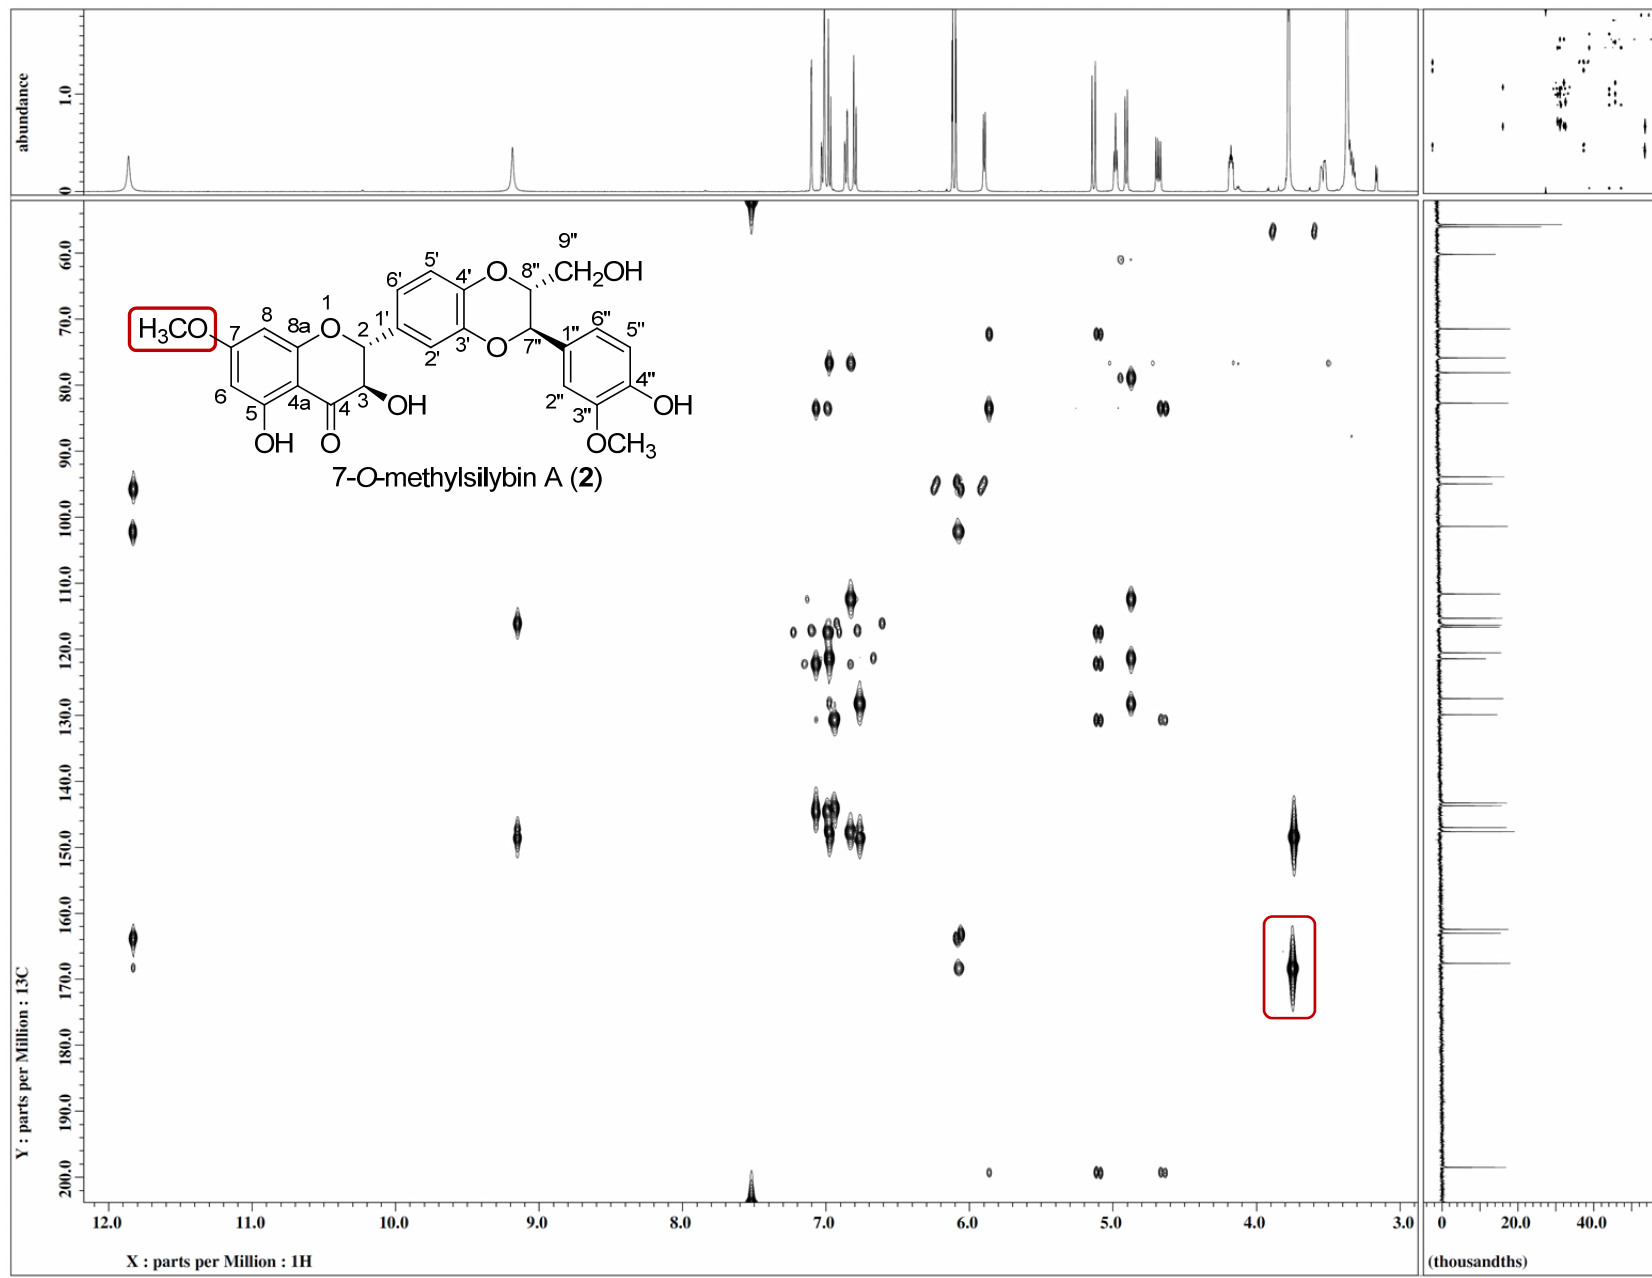

**Figure S5.**  $^1\text{H}$  NMR spectra (500 MHz, 30 °C) of silybin B (**3**) and 7-*O*-methylsilybin B (**4**) in  $\text{DMSO-}d_6$

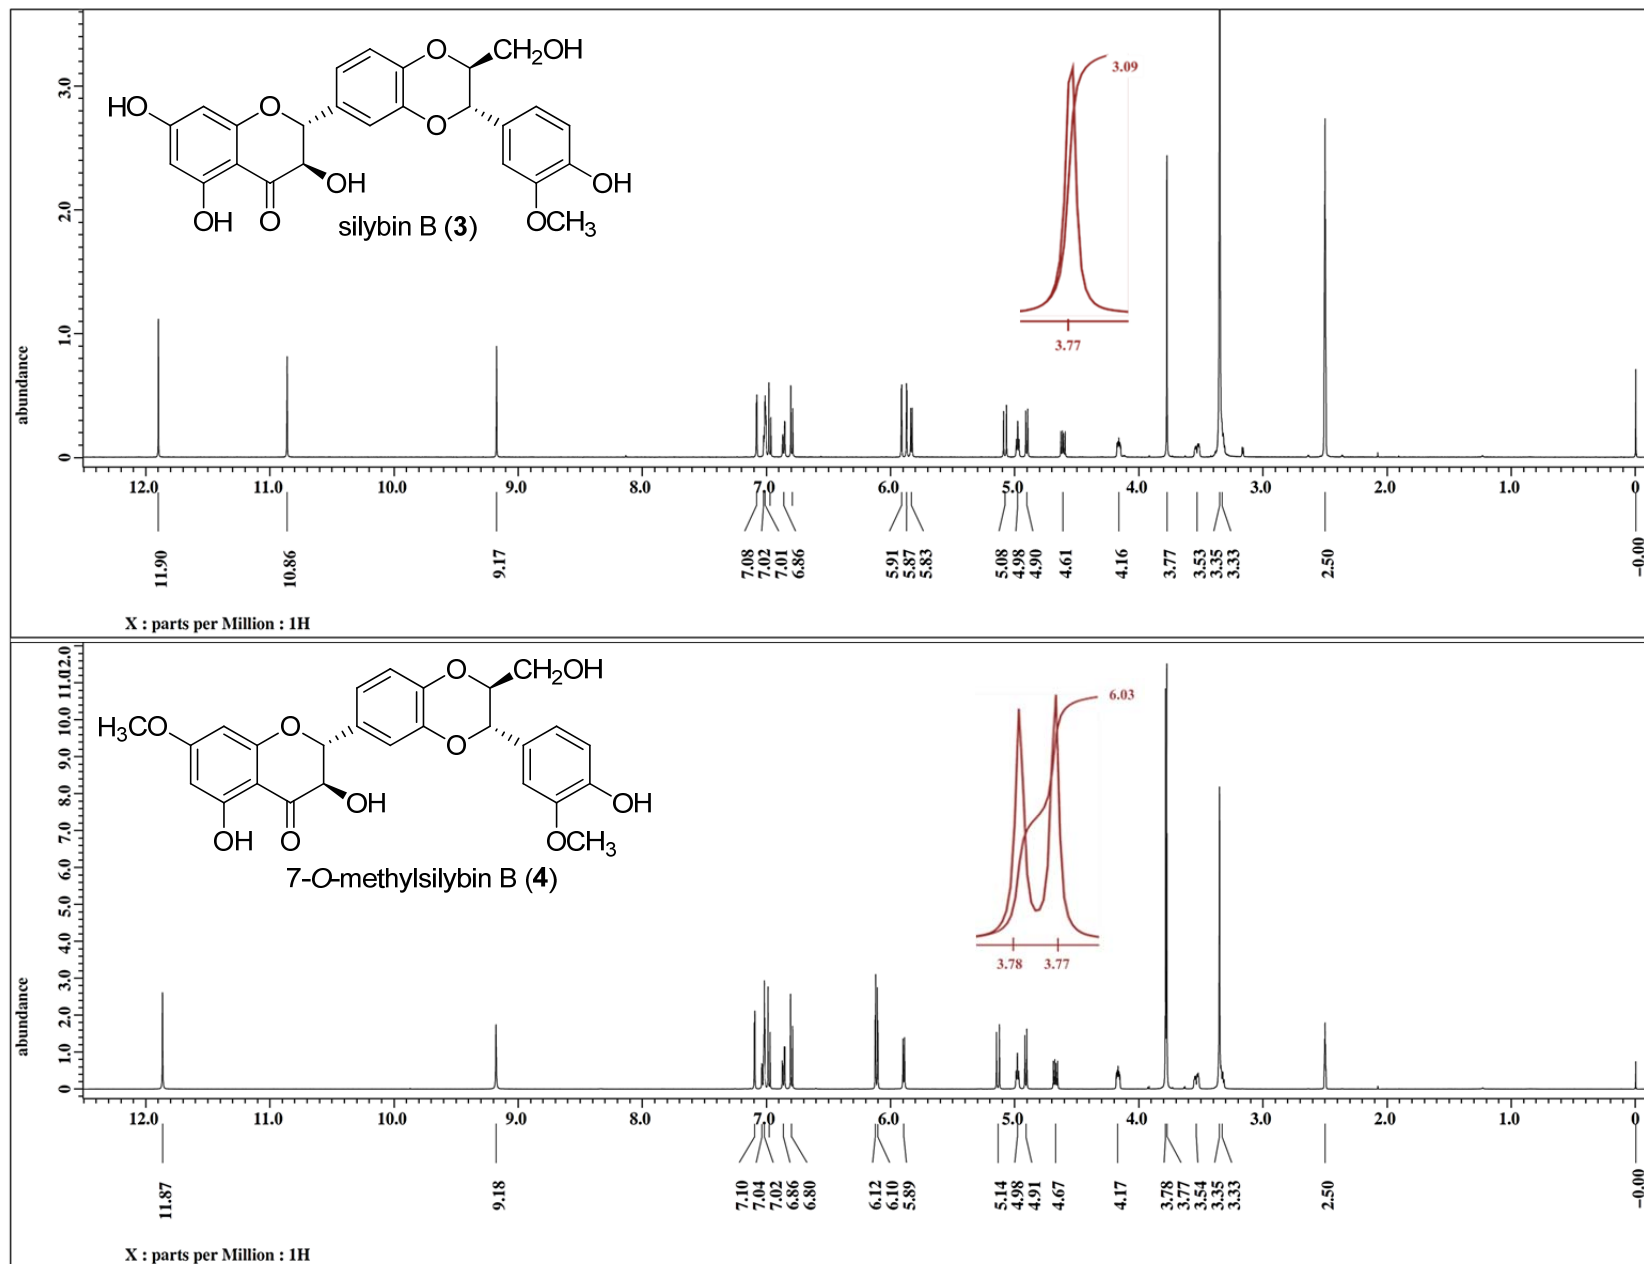

**Figure S6.**  $^{13}\text{C}$  NMR spectra (125 MHz, 30°C) of silybin B (**3**) and 7-*O*-methylsilybin B (**4**) in  $\text{DMSO-}d_6$

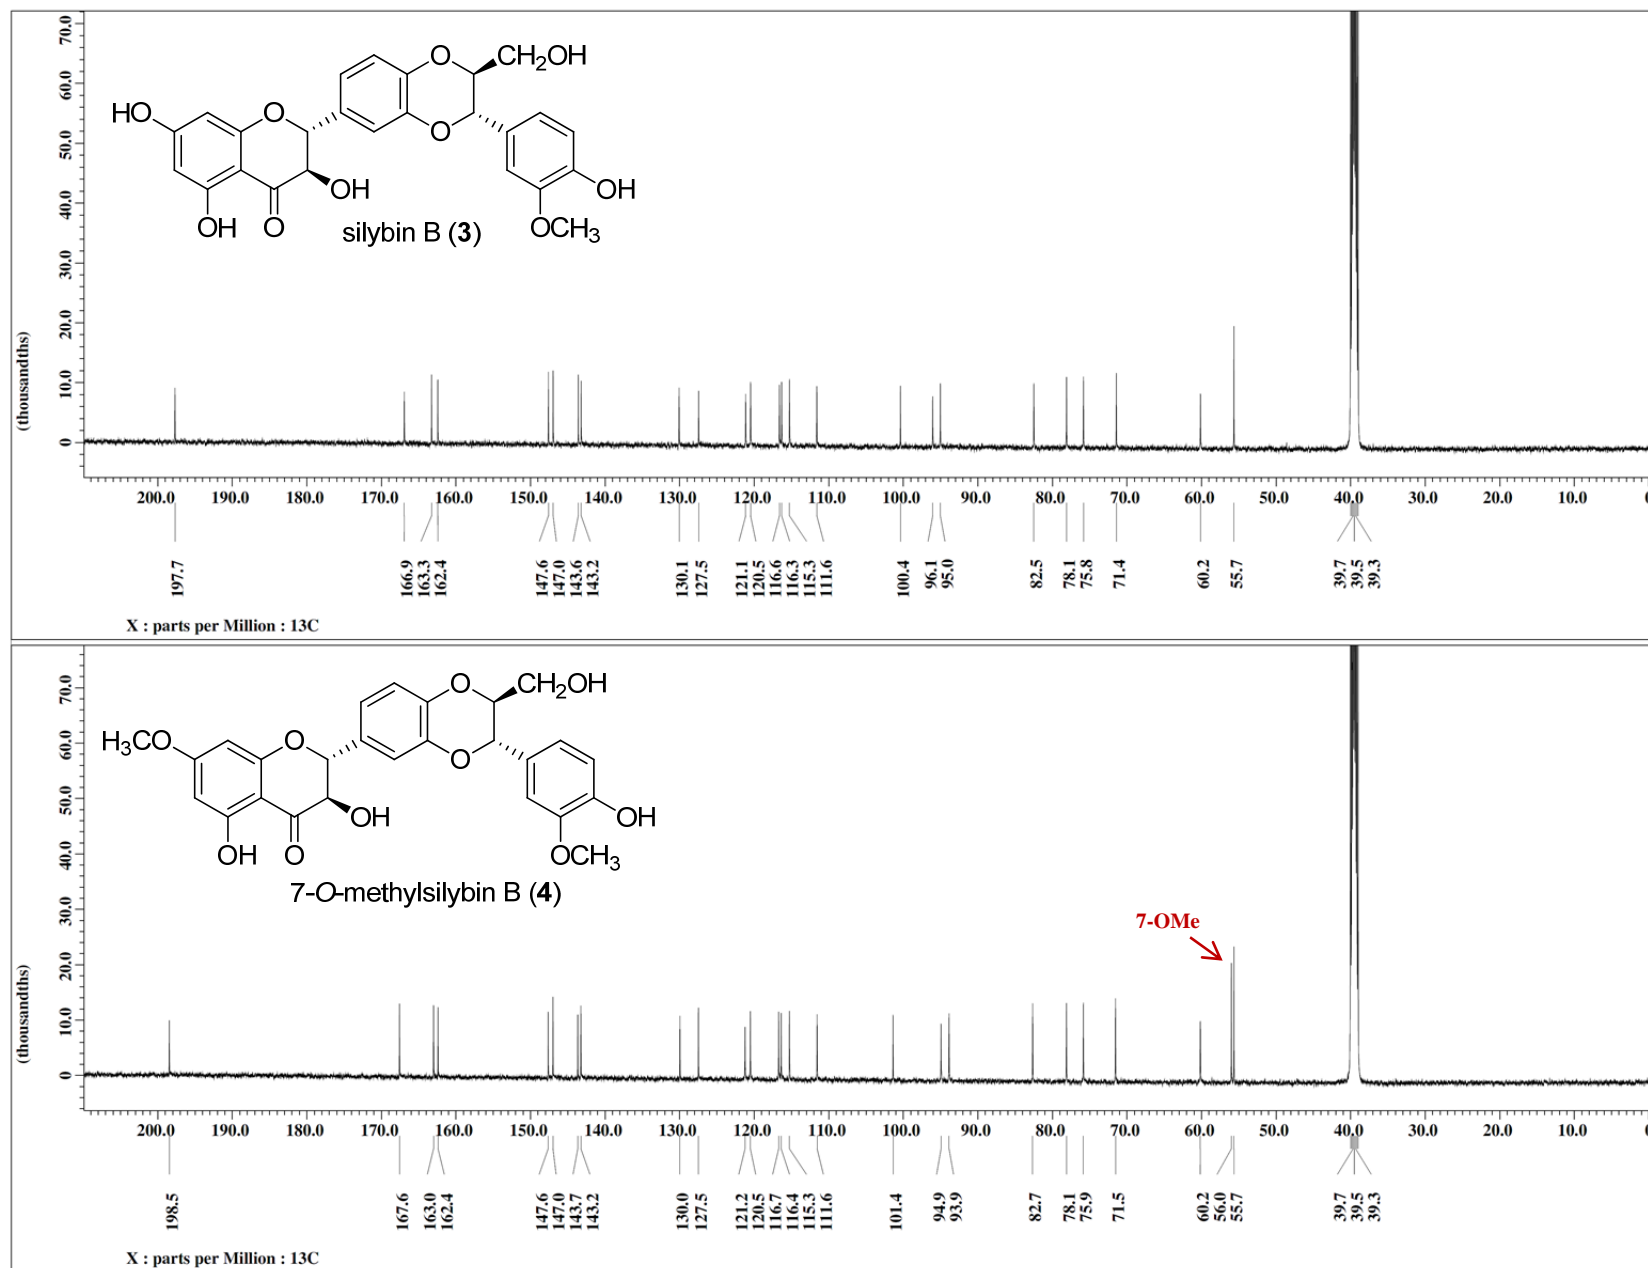



**Figure S7.** HMBC NMR spectrum (DMSO-*d*<sub>6</sub>, 30 °C) of 7-*O*-methylsilybin B (**4**) showing the key correlation between the methoxy protons and C-7

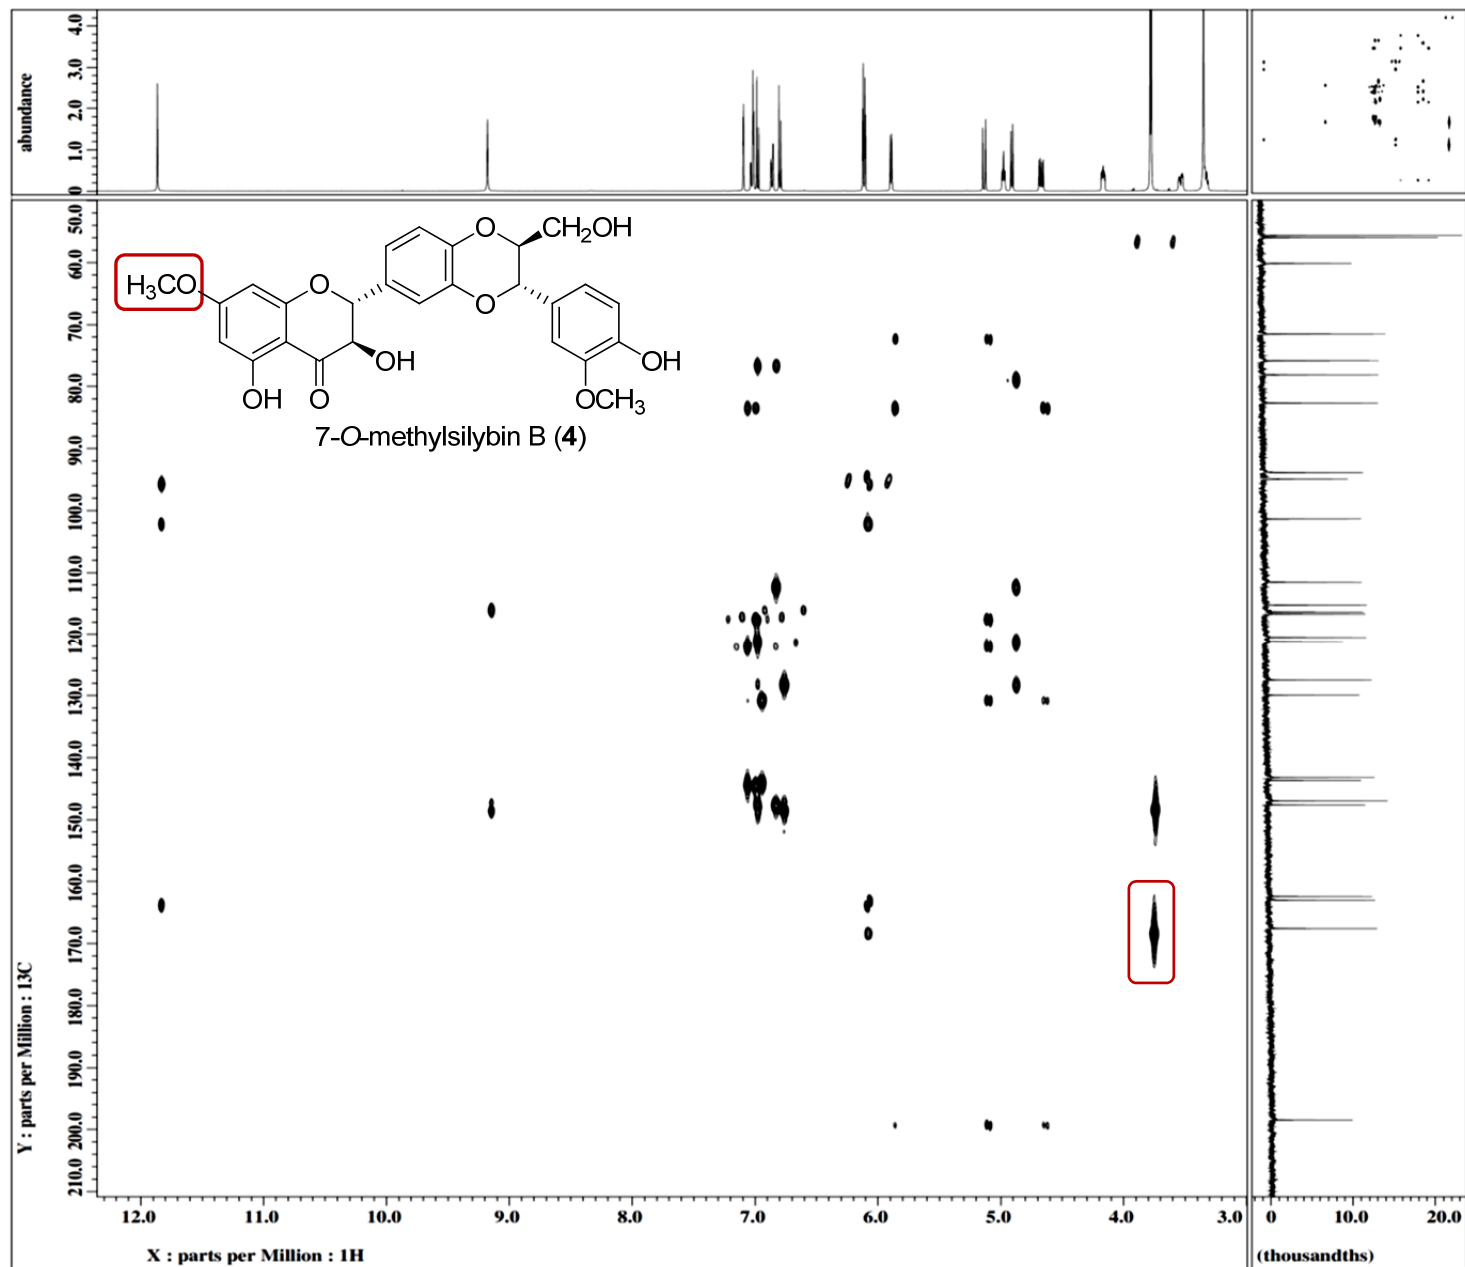

**Figure S8.**  $^1\text{H}$  NMR spectra (500 MHz, 30 °C) of isosilybin A (**5**) and 7-*O*-methylsilybin A (**6**) in  $\text{DMSO-}d_6$

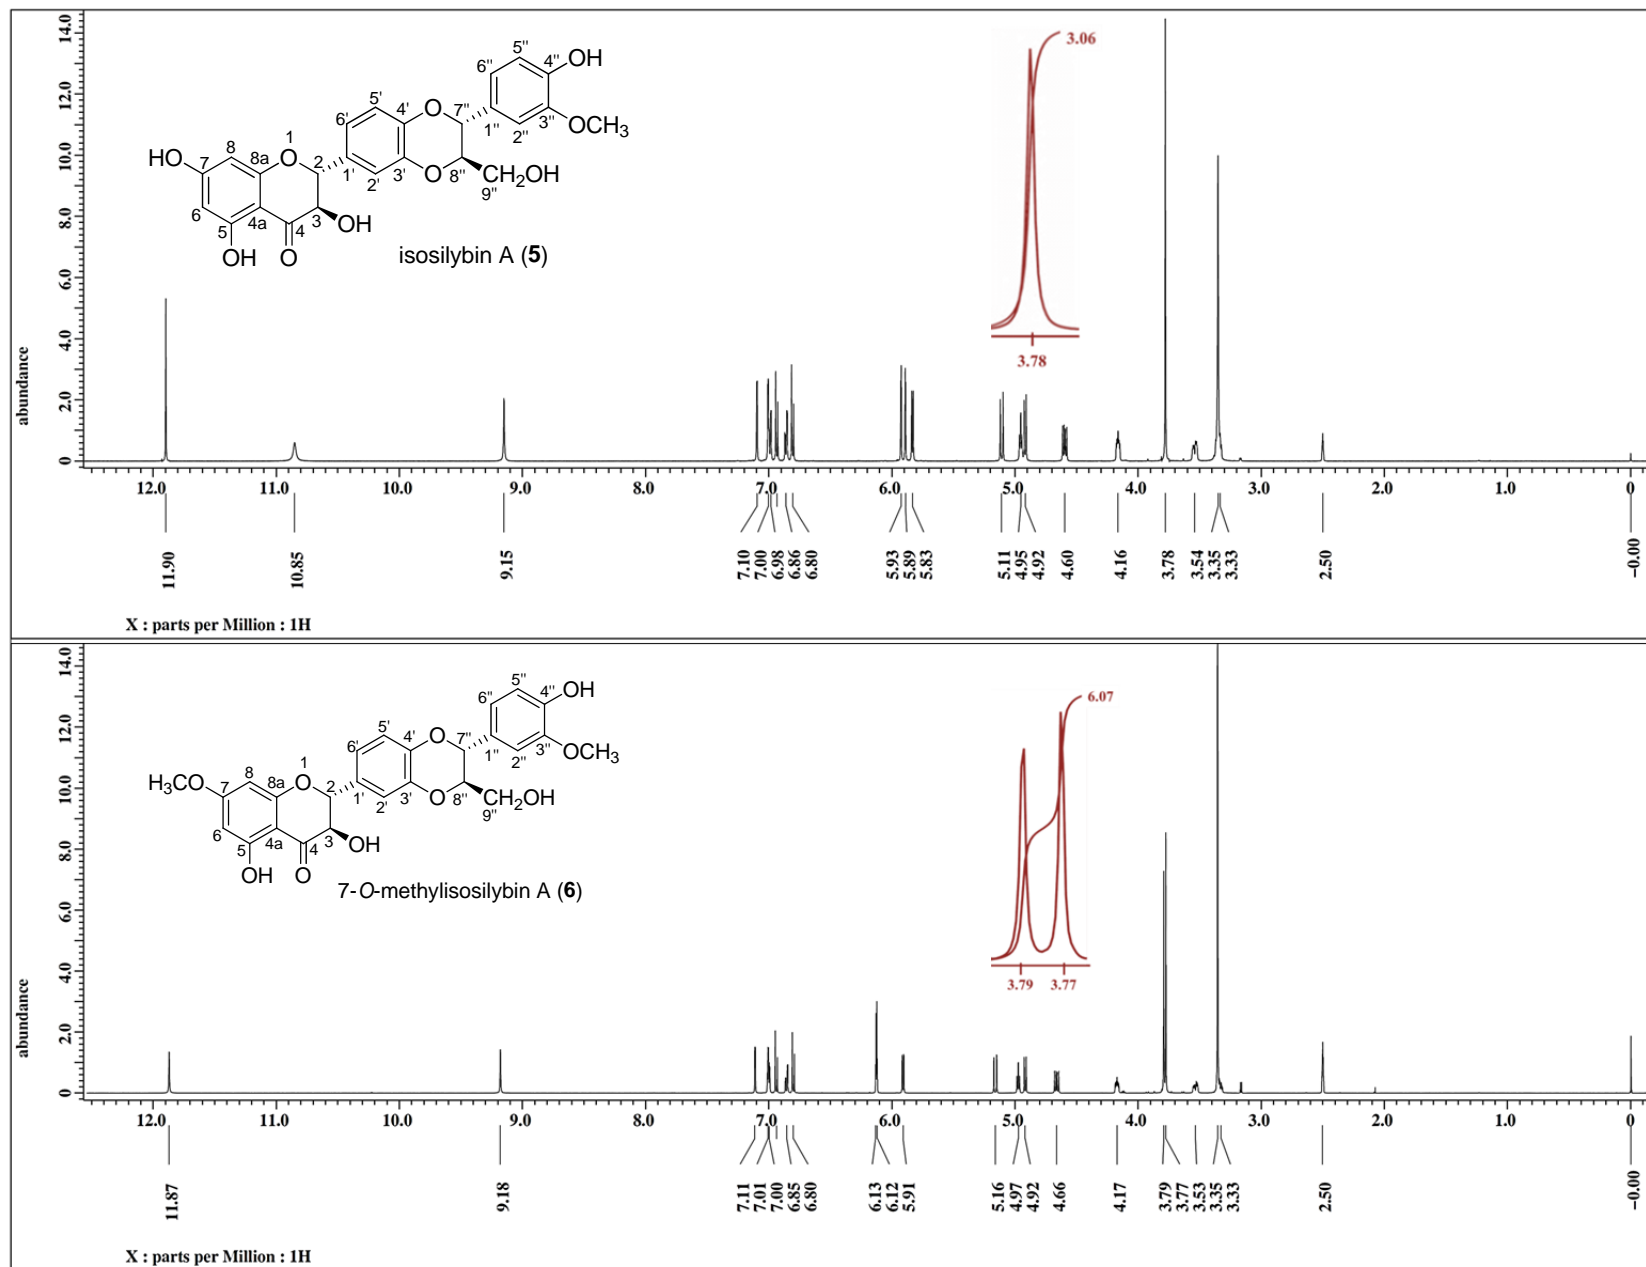

**Figure S9.**  $^{13}\text{C}$  NMR spectra (125 MHz,  $30^\circ\text{C}$ ) of isosilybin A (**5**) and 7-*O*-methylisilybin A (**6**) in  $\text{DMSO-}d_6$

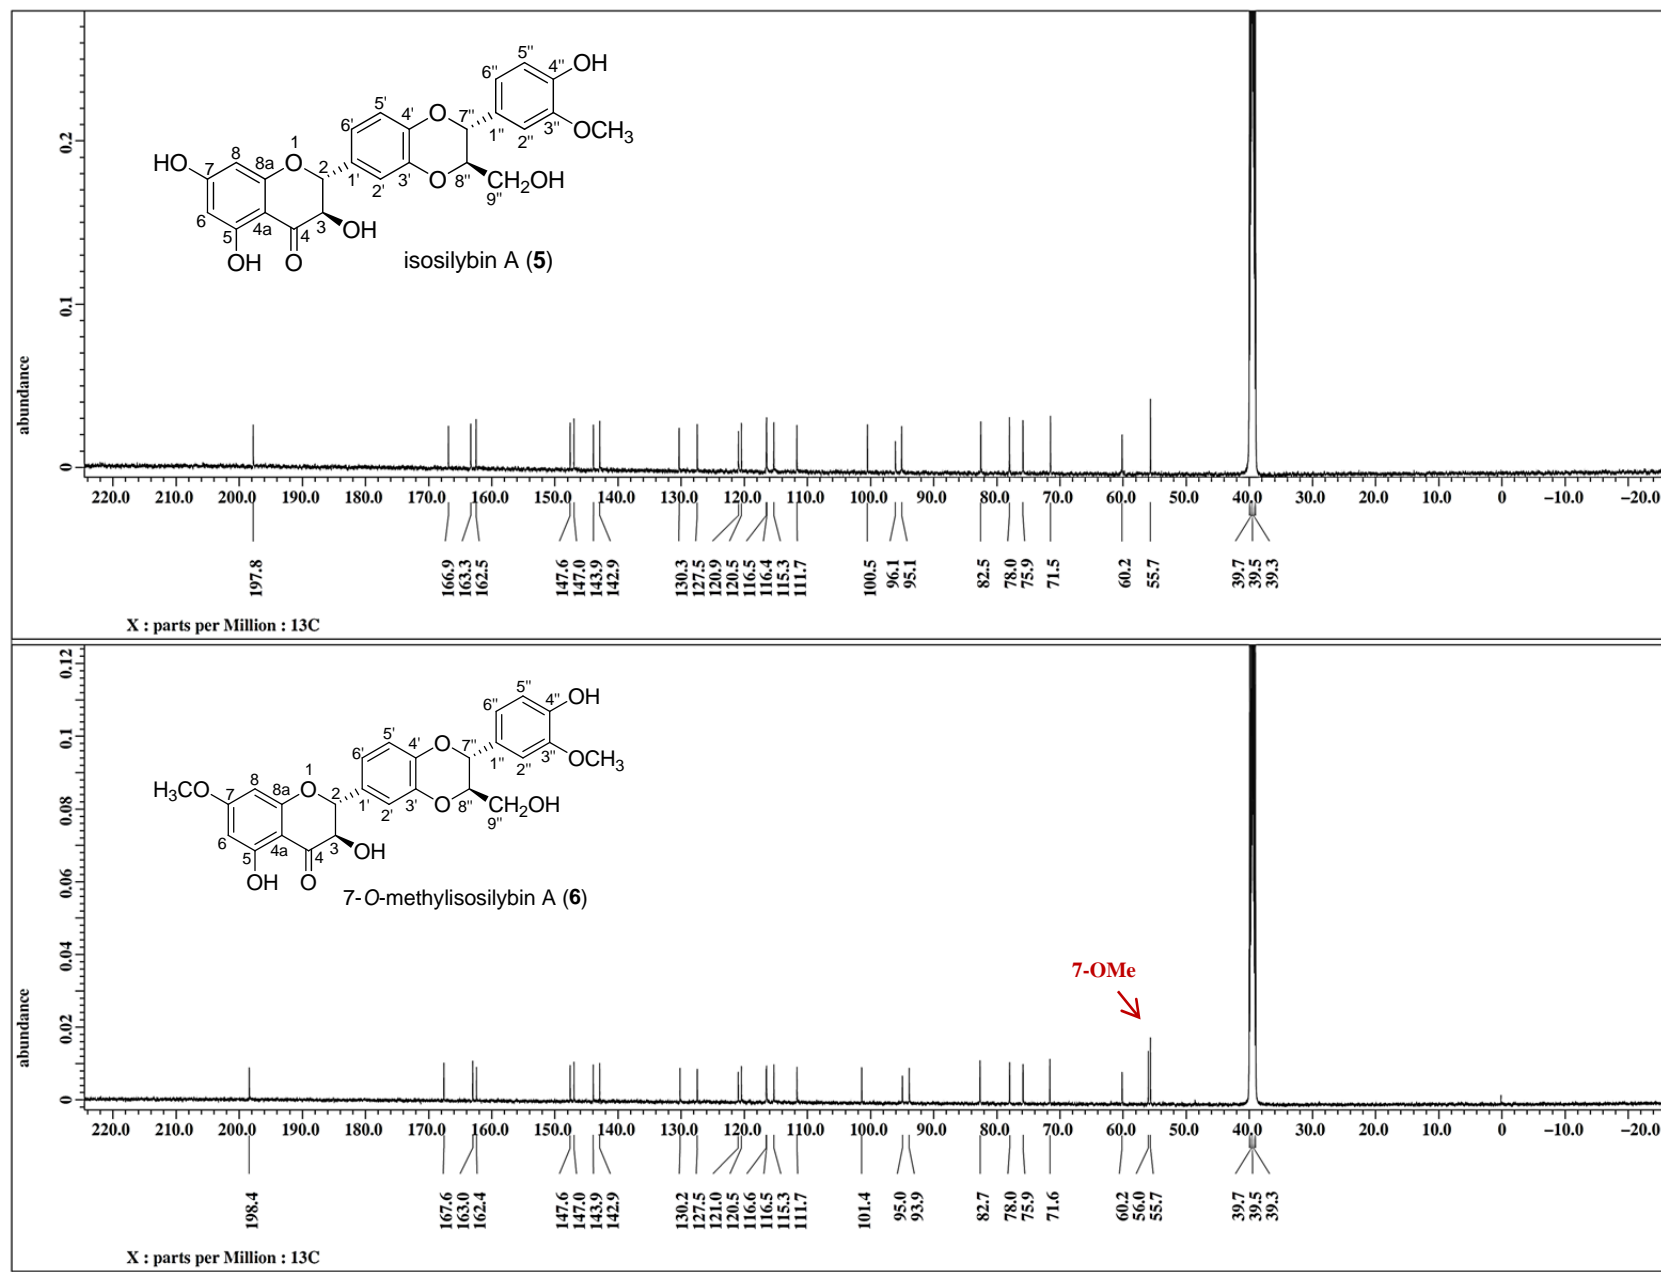

**Figure S10.** HMBC NMR spectrum (DMSO-*d*<sub>6</sub>, 30 °C) of 7-*O*-methylsilybin A (**6**) showing the key correlation between the methoxy protons and C-7

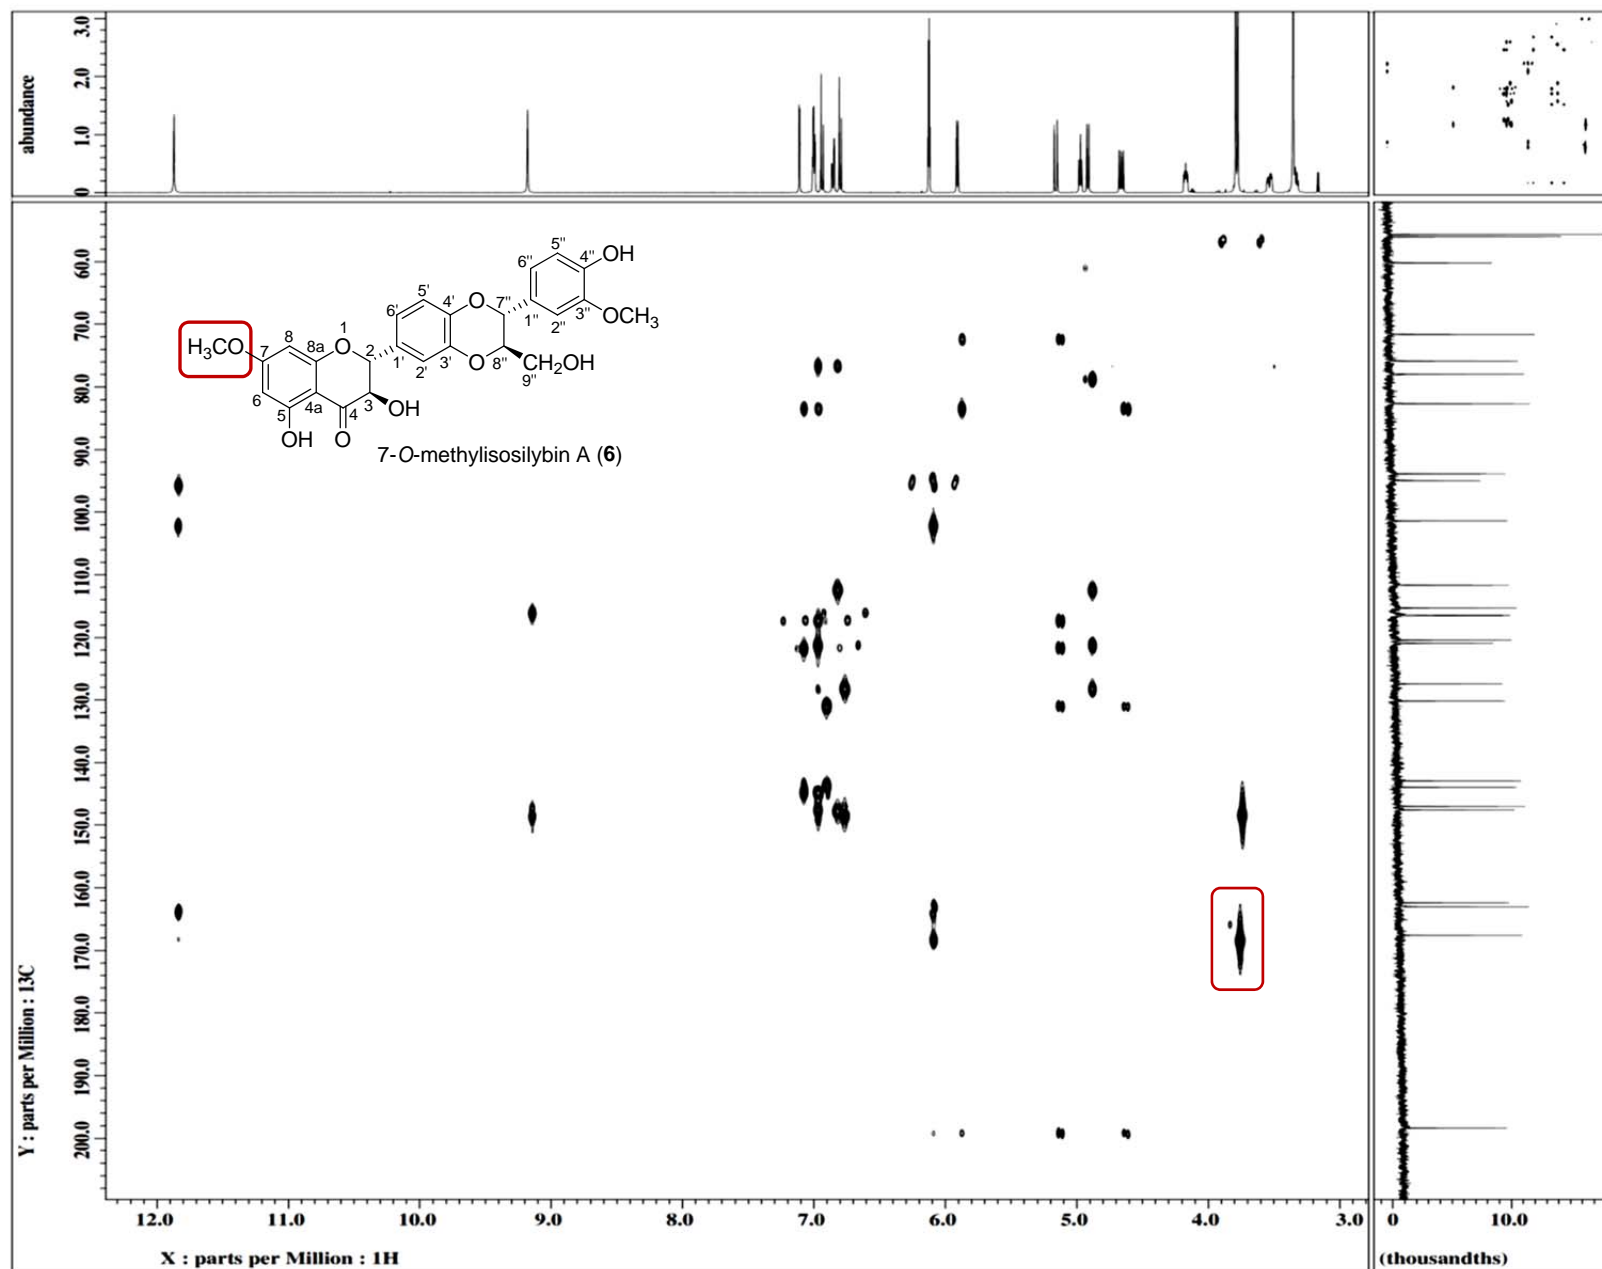

**Figure S11.**  $^1\text{H}$  NMR spectra (500 MHz, 30 °C) of isosilybin B (**7**) and 7-*O*-methylisosilybin B (**8**) in  $\text{DMSO-}d_6$

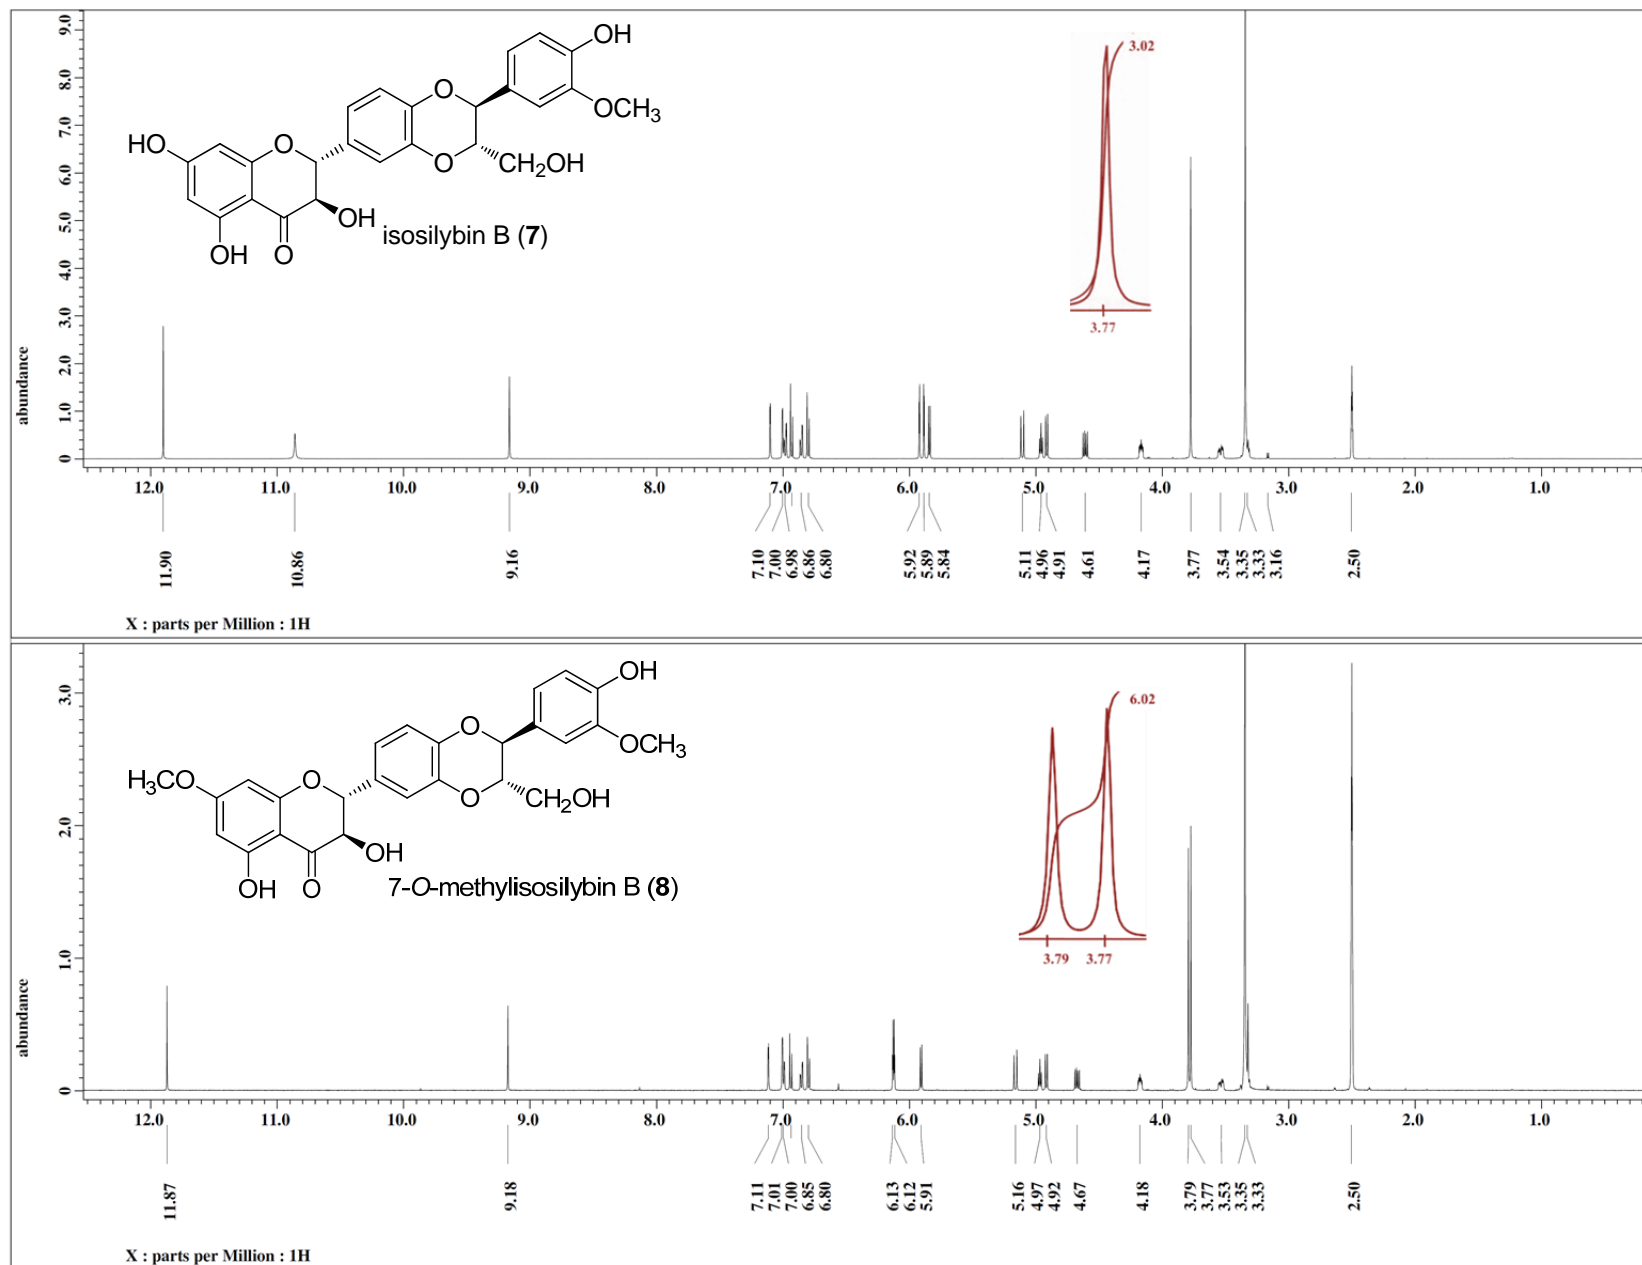

**Figure S12.**  $^{13}\text{C}$  NMR spectra (125 MHz, 30 °C) of isosilybin B (**7**) and 7-*O*-methylisosilybin B (**8**) in  $\text{DMSO-}d_6$

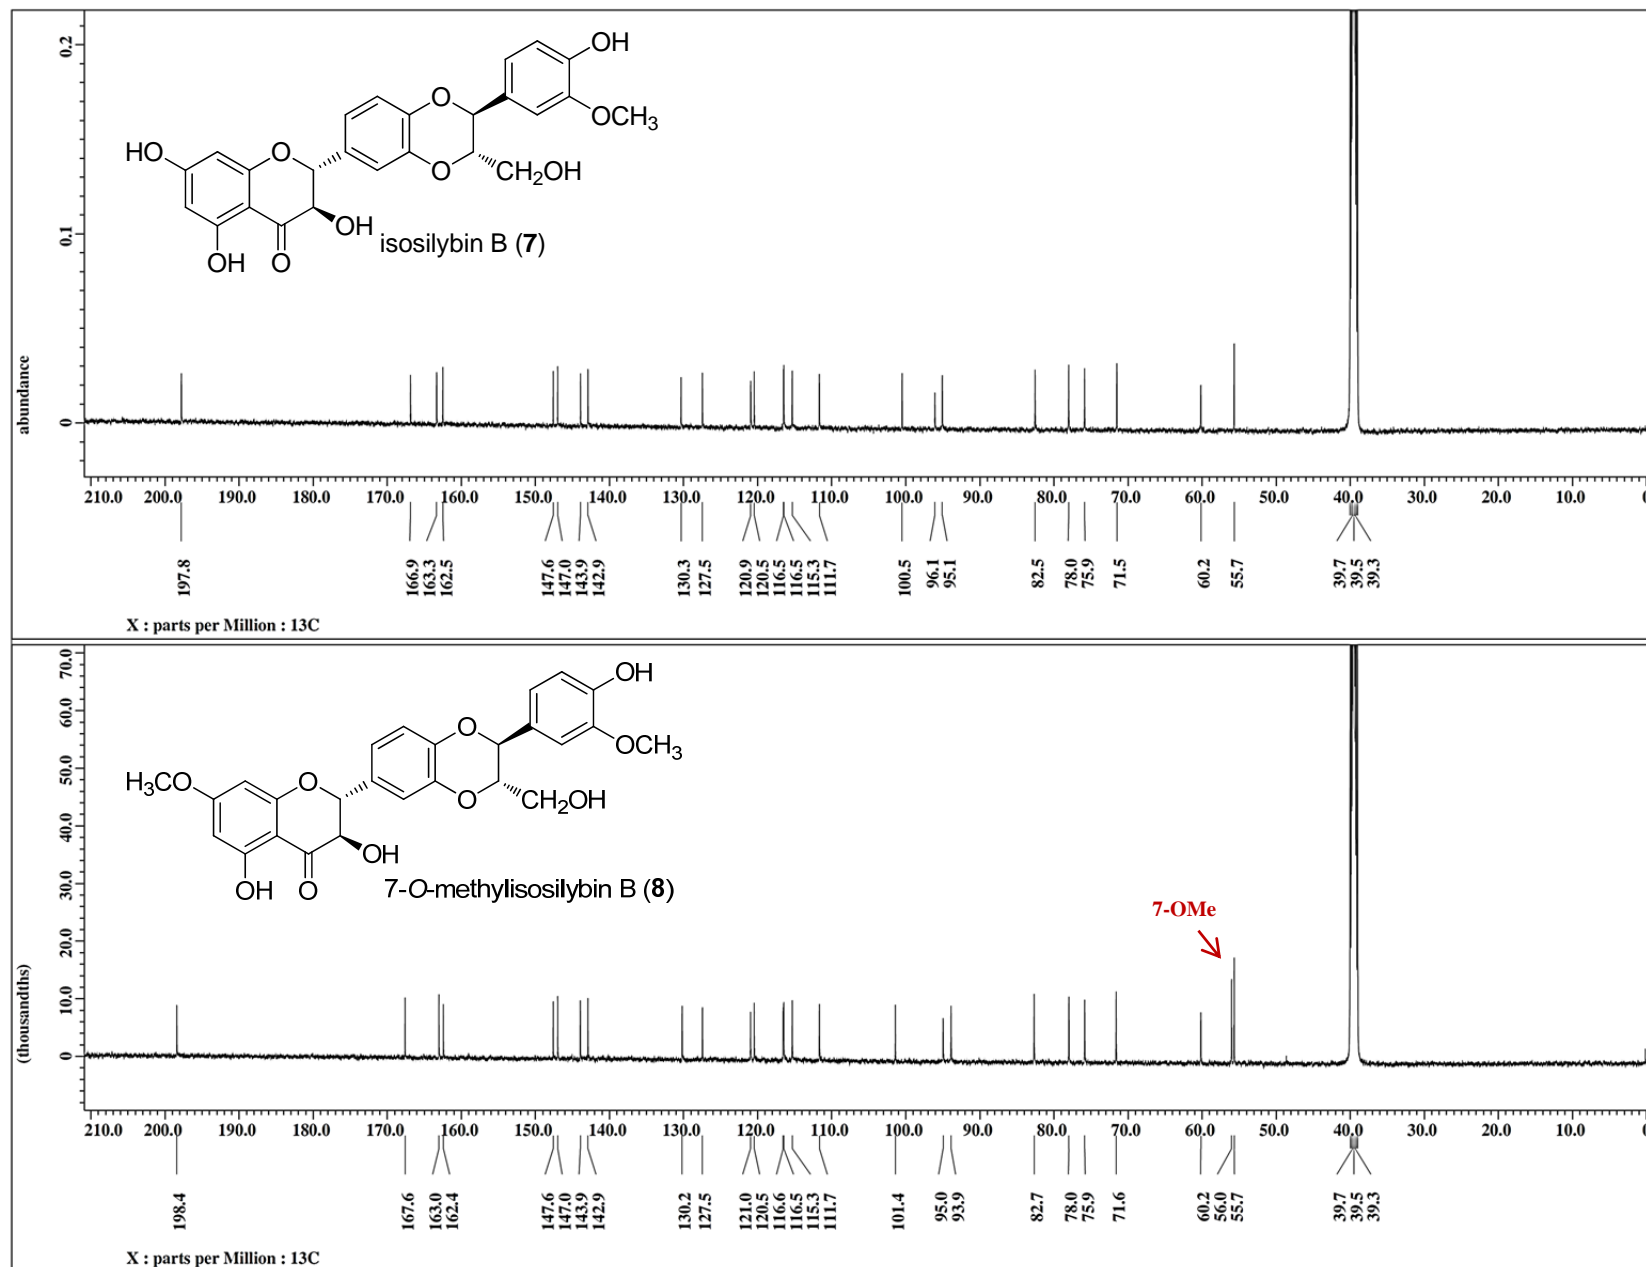

**Figure S13.** HMBC NMR spectrum (DMSO-*d*<sub>6</sub>, 30 °C) of 7-*O*-methylisilybin B (**8**) showing the key correlation between the methoxy protons and C-7

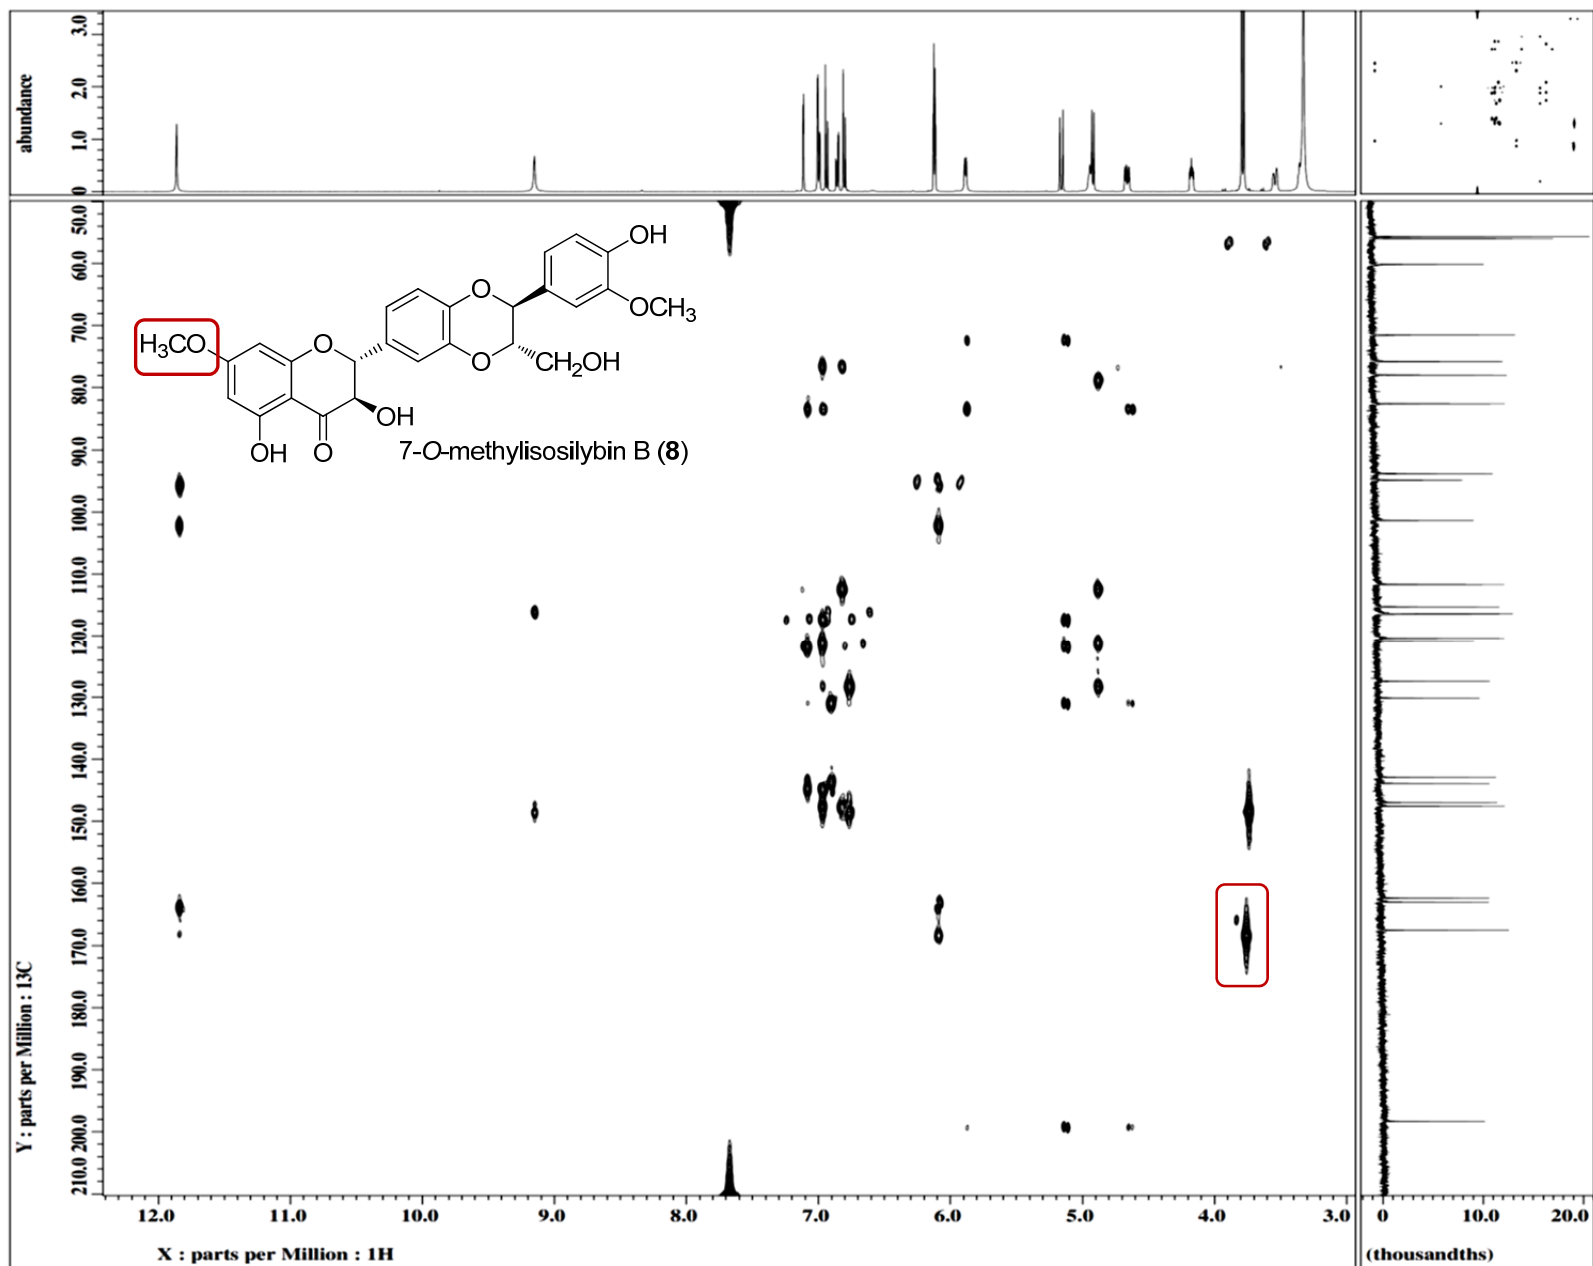





**Figure S15.**  $^{13}\text{C}$  NMR spectra (125 MHz, 30 °C) of silychristin (**9**) and 7-*O*-methylsilychristin (**10**) in  $\text{DMSO-}d_6$

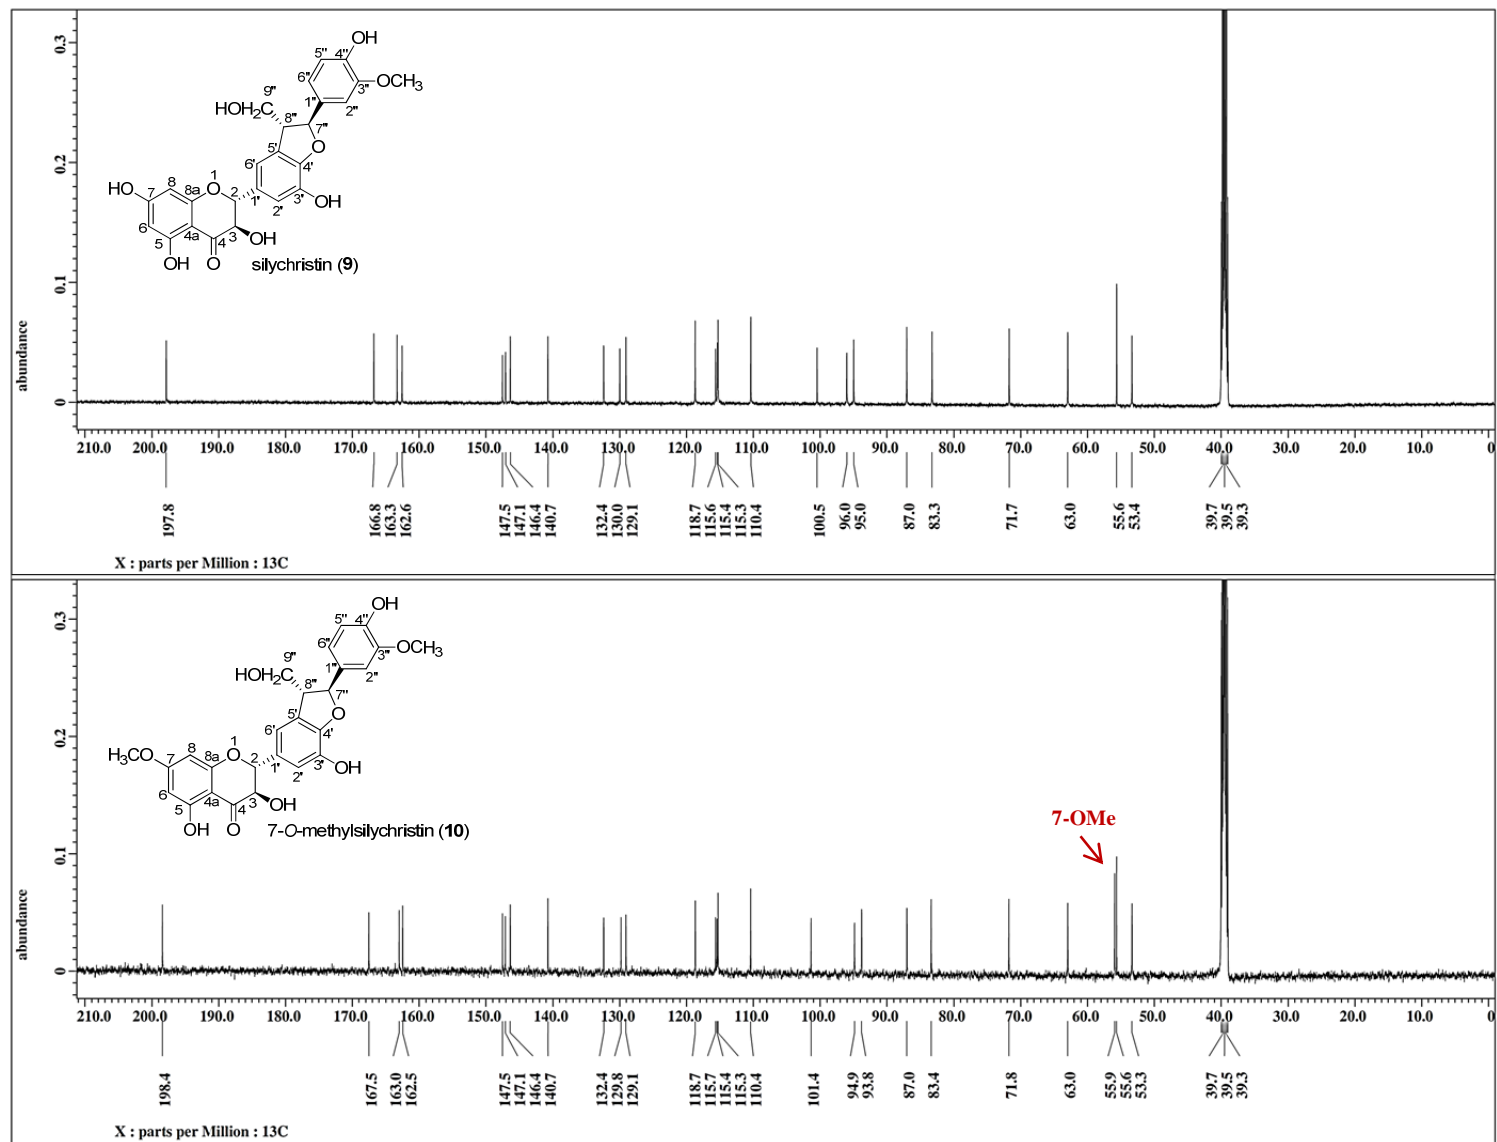

**Figure S16.** HMBC NMR spectrum (DMSO-*d*<sub>6</sub>, 30 °C) of 7-*O*-methylsilychristin (**10**) showing the key correlation between the methoxy protons and C-7

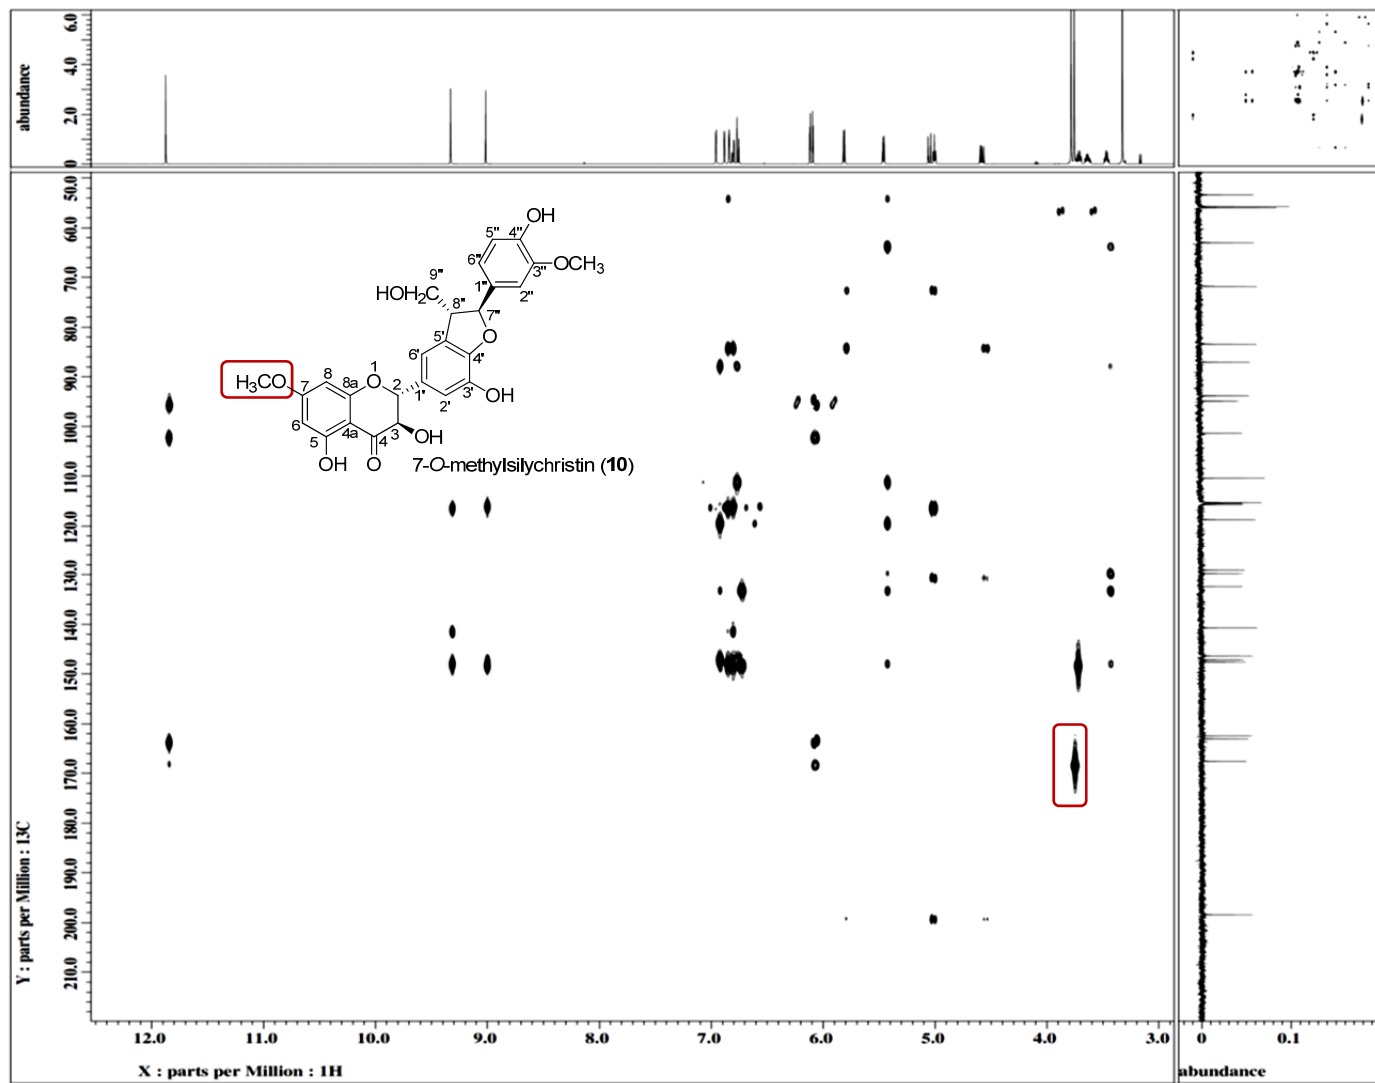

Figure S17.  $^1\text{H}$  NMR spectra (500 MHz, 30 °C) of isosilychristin (**11**) and 7-*O*-methylisosilychristin (**12**) in  $\text{DMSO-}d_6$

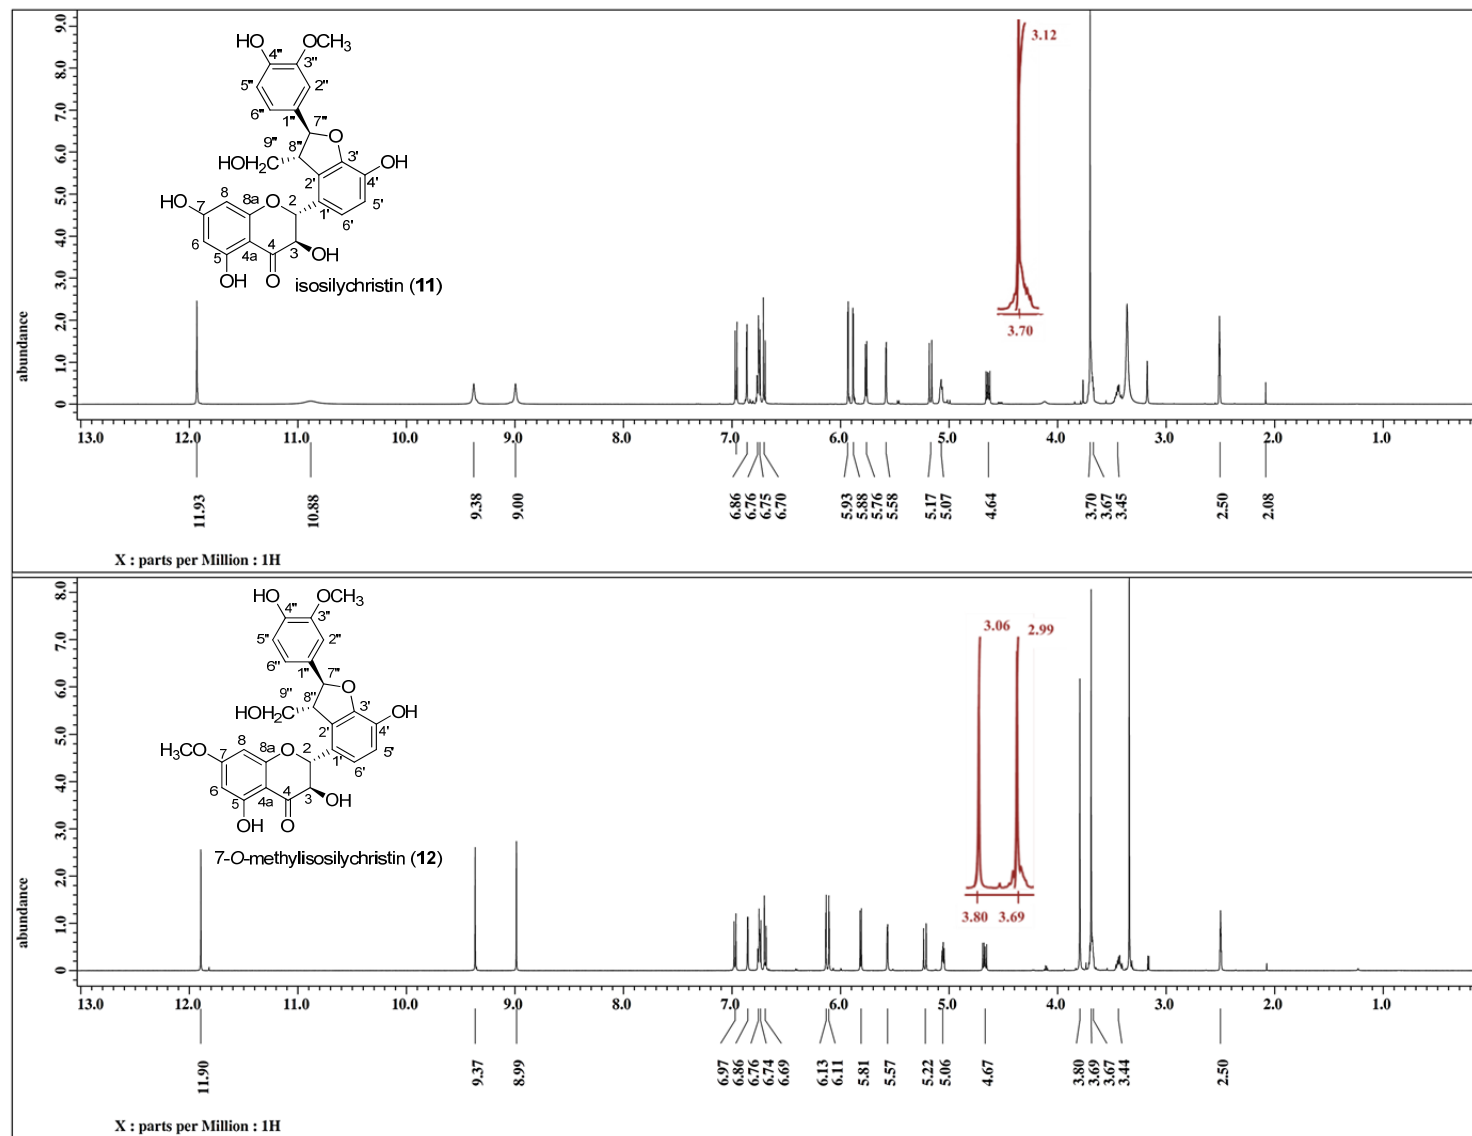

**Figure S18.**  $^{13}\text{C}$  NMR spectra (125 MHz, 30°C) of isosilychristin (**11**) and 7-*O*-methylisosilychristin (**12**) in  $\text{DMSO-}d_6$

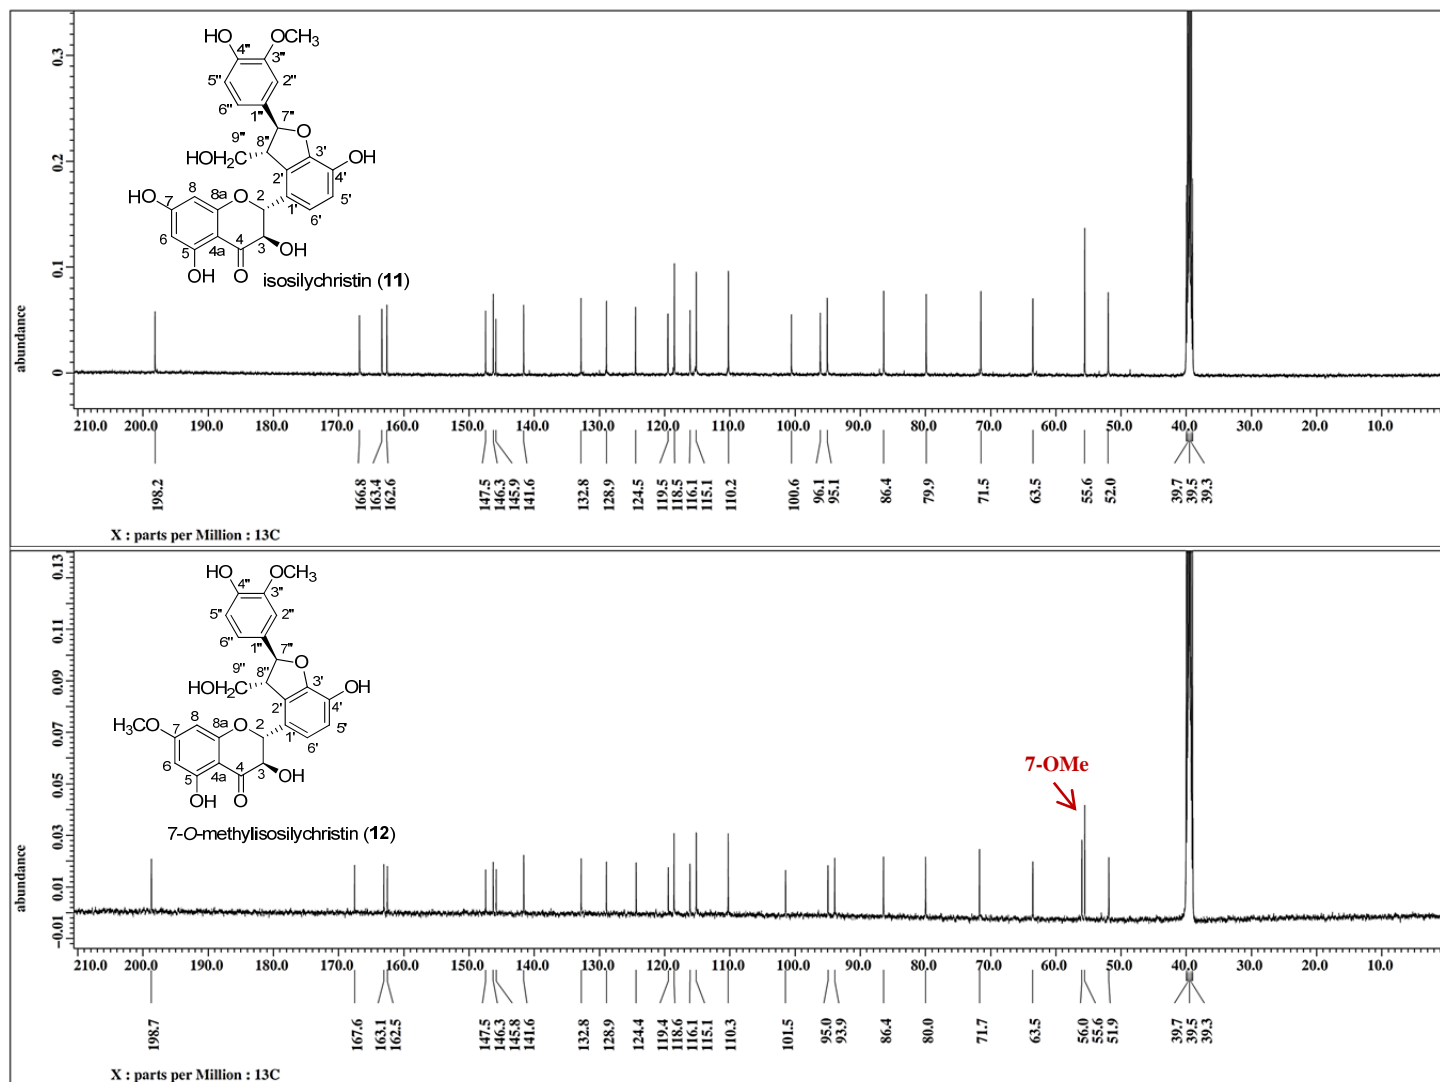

**Figure S19.** HMBC NMR spectrum (DMSO-*d*<sub>6</sub>, 30 °C) of 7-*O*-methylsilychristin (**12**) showing the key correlation between the methoxy protons and C-7

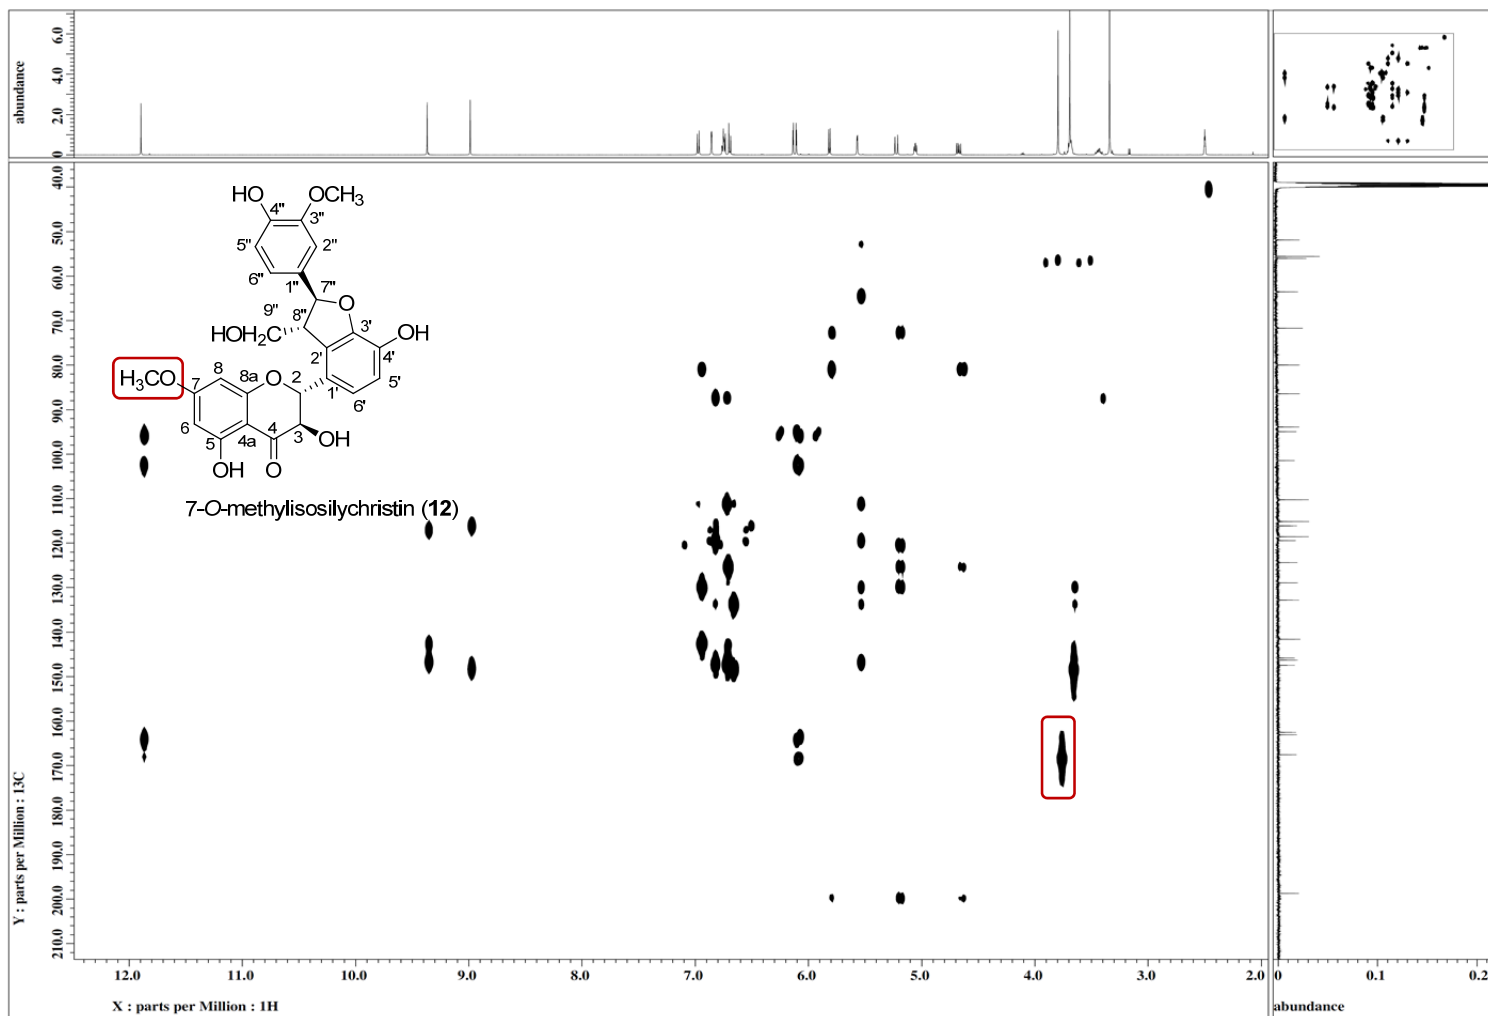

**Figure S20.**  $^1\text{H}$  NMR spectra (500 MHz, 30 °C) of silydianin (**13**) and 7-*O*-methylsilydianin (**14**) in  $\text{DMSO-}d_6$

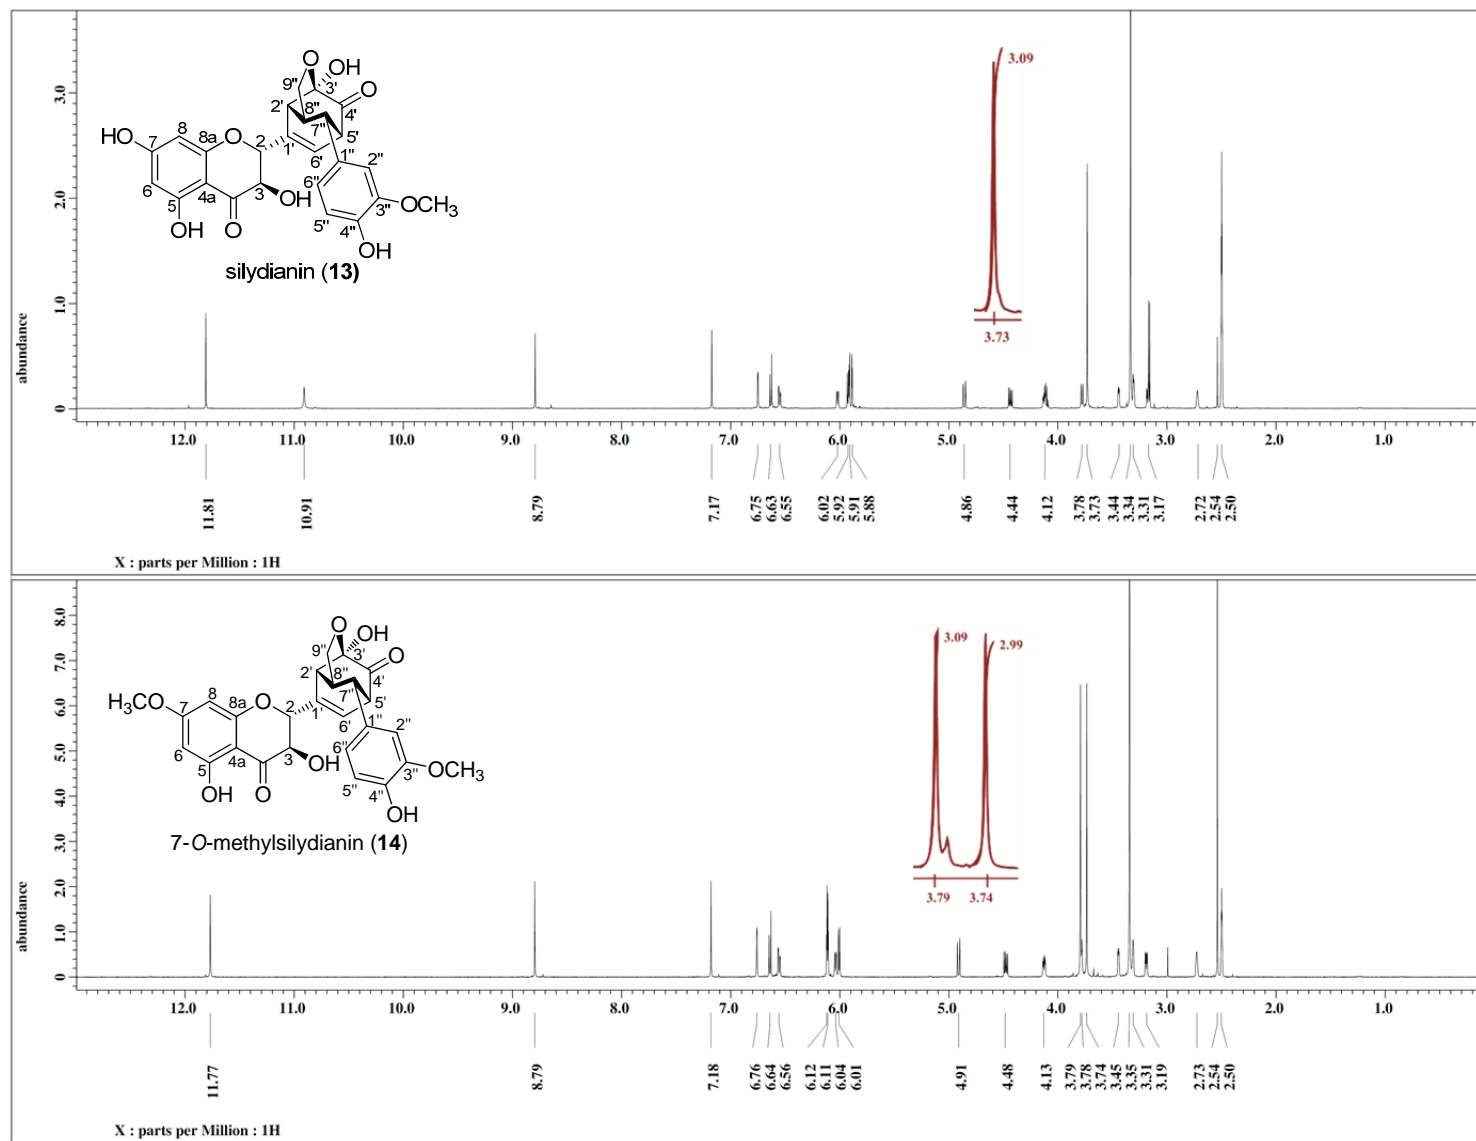

**Figure S21.**  $^{13}\text{C}$  NMR spectra (125 MHz, 30 °C) of silydianin (**13**) and 7-*O*-methylsilydianin (**14**) in  $\text{DMSO-}d_6$

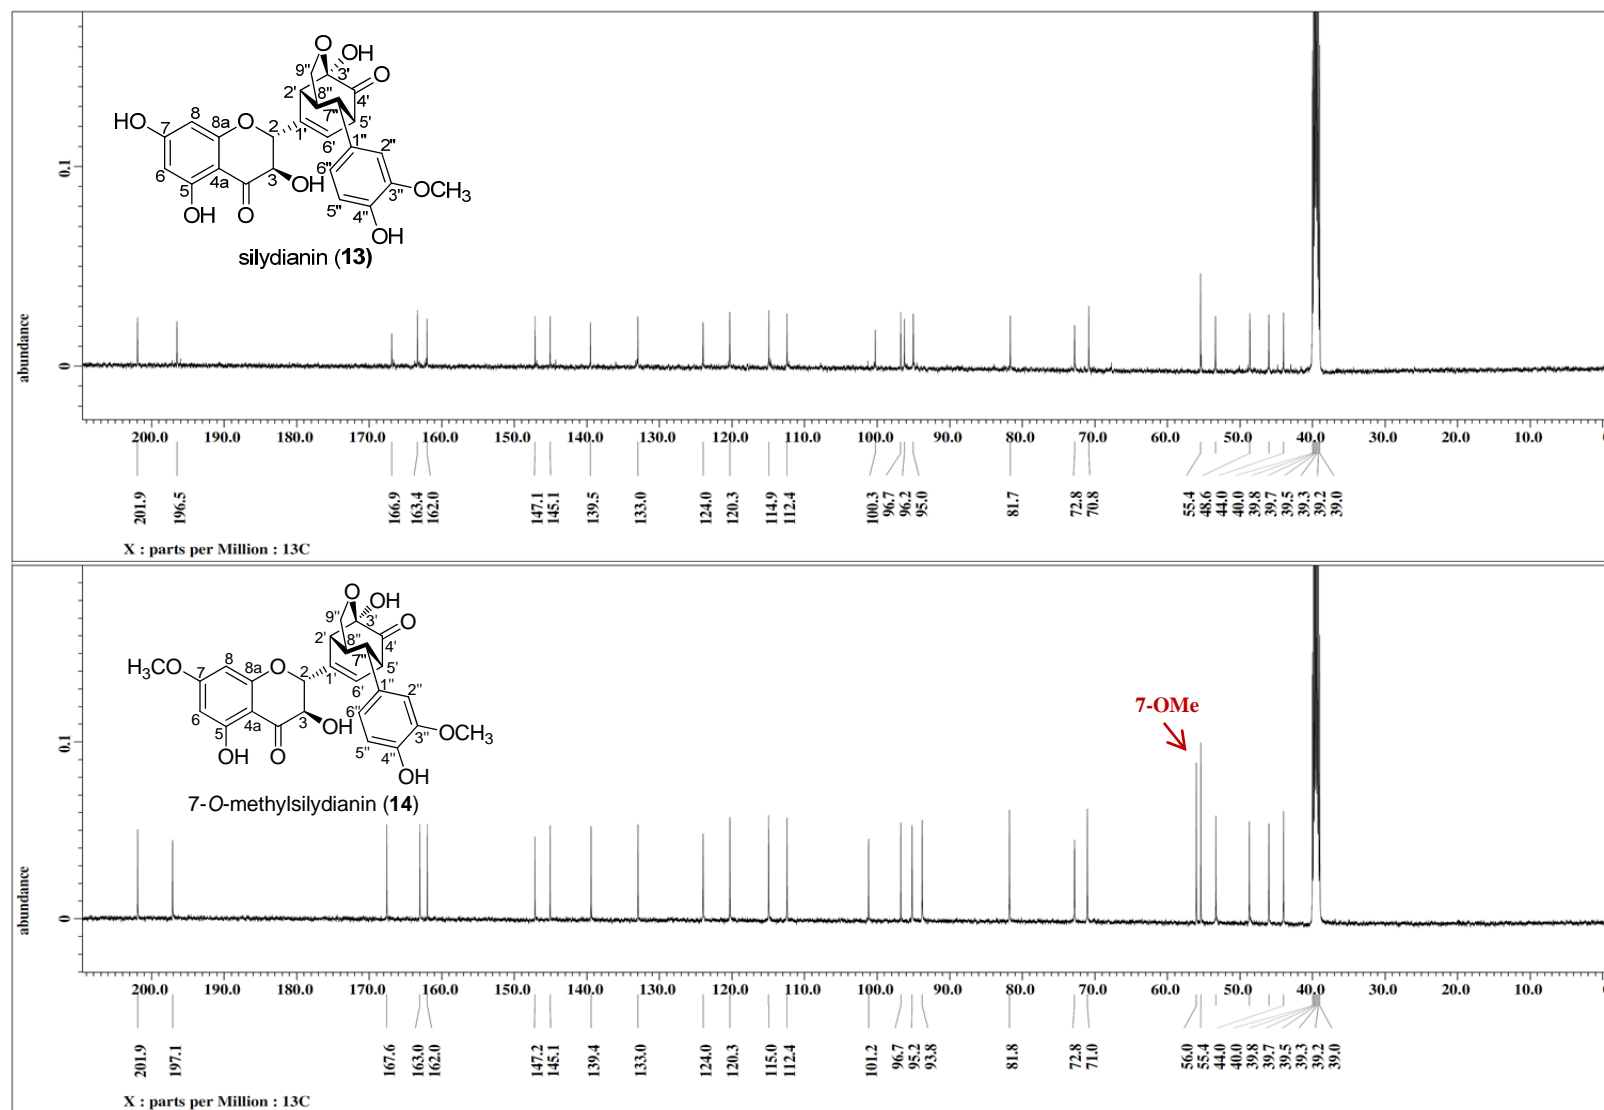

**Figure S22.** HMBC NMR spectrum (DMSO-*d*<sub>6</sub>, 30 °C) of 7-*O*-methylsilydianin (**14**) showing the key correlation between the methoxy protons and C-7

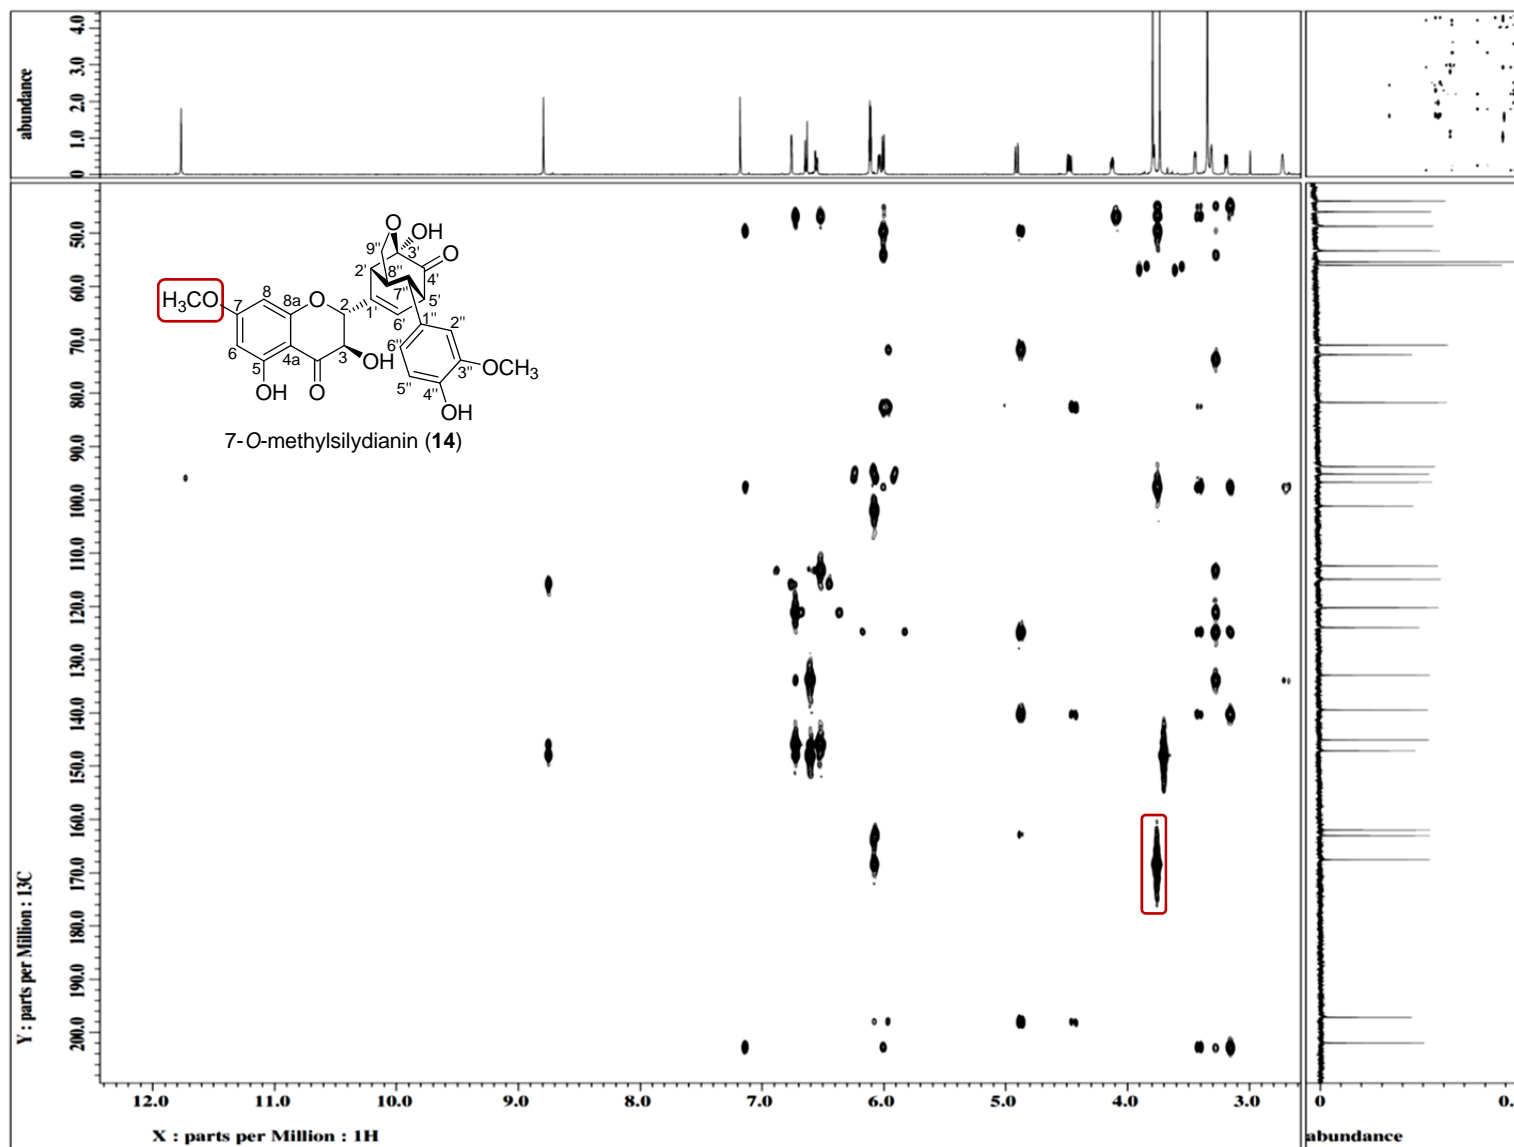



**Figure S23.** Key HMBC correlations of 7-*O*-methylflavonolignans

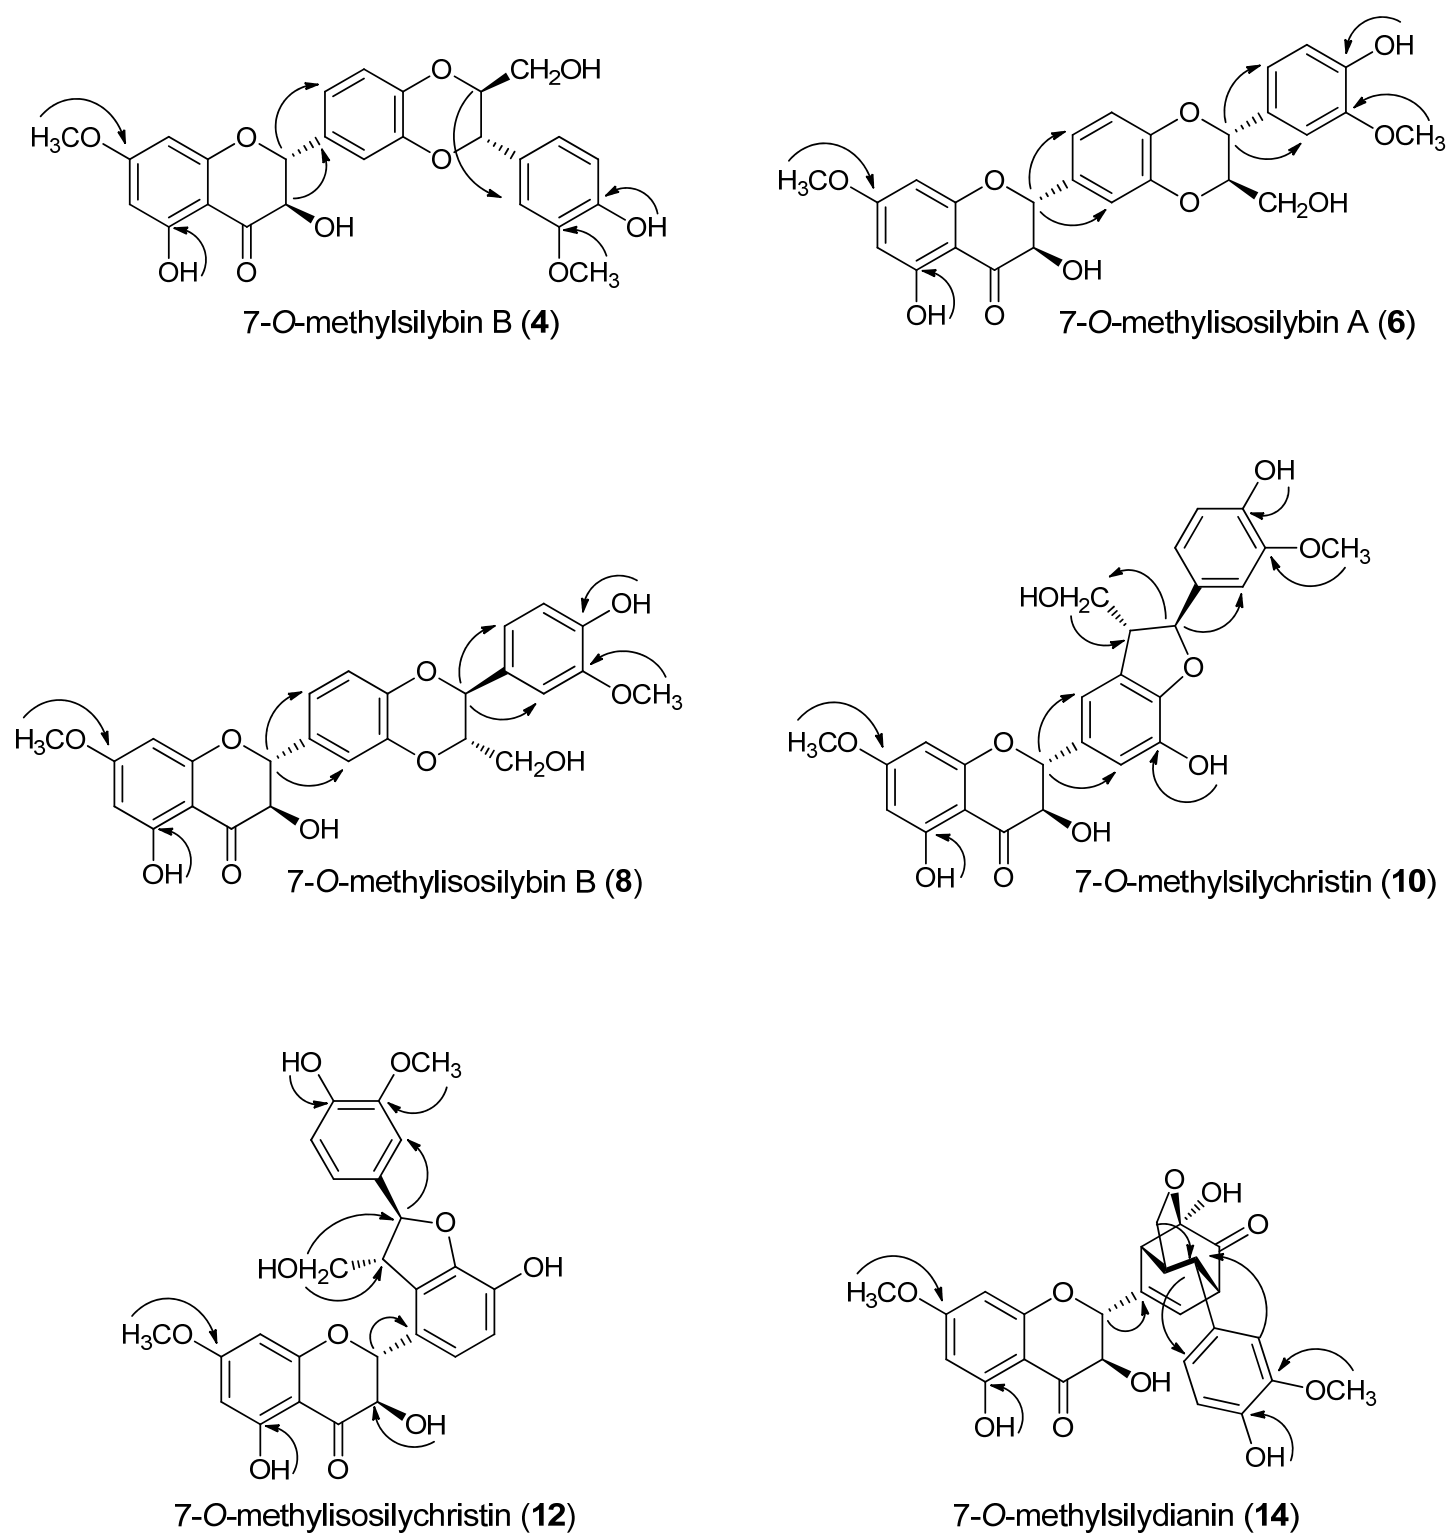

Supplement: NIHMS470362-supplement-1.pdf [file NIHMS470362-supplement-1.pdf]
